# Supplementary material for: Tris(tropolonato) ruthenium as a hub for connecting π-conjugated systems
Source: Royal Society of Chemistry journal article supplement (doi:10.1039/c9dt04860j), 2020-01-01
Supplement: c9dt04860j1.pdf [file c9dt04860j1.pdf]

## Supporting Information

# Tris(tropolonato) ruthenium as a hub for connecting $\pi$ -conjugated systems

Jun Yoshida,\* Kazunori Tateyama and Hidetaka Yuge

## Table of Contents

|                                                                       |    |
|-----------------------------------------------------------------------|----|
| <b>Single crystal X-ray diffraction analysis</b> .....                | 2  |
| <b>ESI mass spectra</b> .....                                         | 4  |
| <b><sup>1</sup>H NMR Spectra</b> .....                                | 9  |
| <b>UV-vis-NIR spectra</b> .....                                       | 15 |
| <b>Cyclic voltammograms</b> .....                                     | 17 |
| <b><math>\Delta E</math> values of related complexes</b> .....        | 20 |
| <b>Spectroelectrochemical study (electrochemical reduction)</b> ..... | 21 |
| <b>Spectroelectrochemical study (electrochemical oxidation)</b> ..... | 22 |
| <b>Chemical oxidation</b> .....                                       | 29 |
| <b>DFT calculations</b> .....                                         | 32 |
| <b>Time-course UV-vis spectra</b> .....                               | 48 |
| <b>References</b> .....                                               | 49 |

## Single crystal X-ray diffraction analysis

The crystal structures of **4b** was determined by the single-crystal X-ray diffraction method. A Rigaku XtaLAB Synergy-S (Cu-K $\alpha$  radiation) with a HyPix-6000 area detector was used for the data collection. The structures were solved using the program *SHELXT*.<sup>1</sup> The refinement and all further calculations were carried out using the program *SHELXL*<sup>2</sup> via *OLEX2*.<sup>3</sup> All H atoms were generated geometrically.

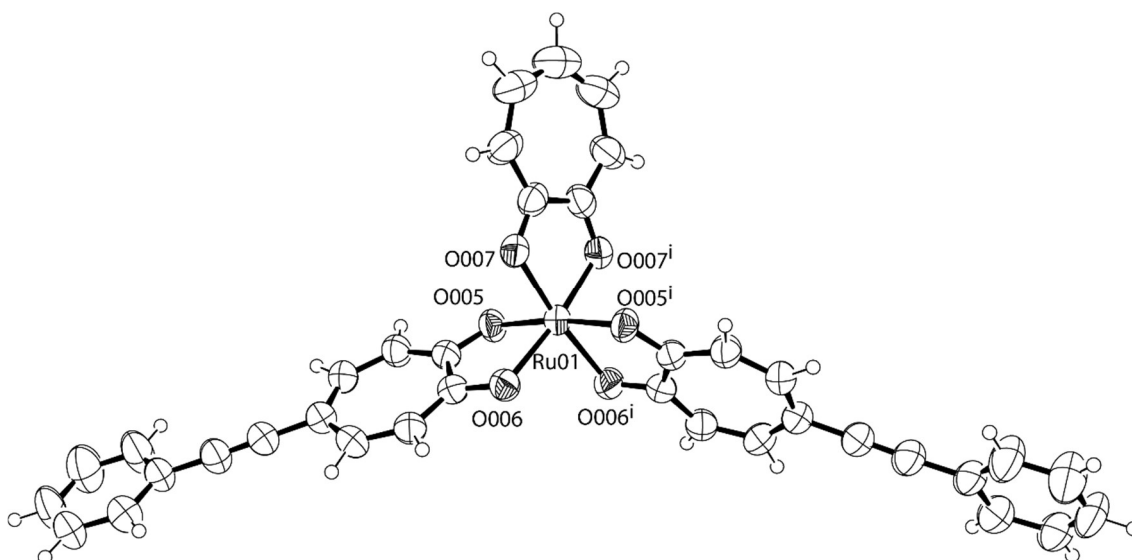

**Figure S1** ORTEP representation of **4b** (50% probability level, symmetry code: (i)  $-x+1, y, -z+1/2$ ).

**Table S1** Crystallographic and experimental data for **4b**.

| <b>Compound</b>                                                                                                 | <b>4b</b>                                                               |
|-----------------------------------------------------------------------------------------------------------------|-------------------------------------------------------------------------|
| Formula                                                                                                         | C <sub>37</sub> H <sub>23</sub> O <sub>6</sub> Ru·2(CHCl <sub>3</sub> ) |
| Formula weight                                                                                                  | 903.36                                                                  |
| Crystal system                                                                                                  | Monoclinic                                                              |
| Space group                                                                                                     | C2/c                                                                    |
| <i>a</i> / Å                                                                                                    | 24.5500 (4)                                                             |
| <i>b</i> / Å                                                                                                    | 10.6232 (2)                                                             |
| <i>c</i> / Å                                                                                                    | 14.7279 (3)                                                             |
| $\alpha$ / °                                                                                                    | -                                                                       |
| $\beta$ / °                                                                                                     | 96.420 (2)                                                              |
| $\gamma$ / °                                                                                                    | -                                                                       |
| <i>V</i> / Å <sup>3</sup>                                                                                       | 3816.94 (12)                                                            |
| <i>Z</i>                                                                                                        | 4                                                                       |
| $\mu$ (mm <sup>-1</sup> )                                                                                       | 7.58                                                                    |
| <i>T</i> / K                                                                                                    | 173(2)                                                                  |
| Crystal size / mm                                                                                               | 0.1, 0.03, 0.03                                                         |
| No. of measured, independent and observed [ <i>I</i> > 2 $\sigma$ ( <i>I</i> )] reflections                     | 18613, 3930, 3618                                                       |
| R <sub>int</sub>                                                                                                | 0.096                                                                   |
| <i>R</i> [ <i>F</i> <sup>2</sup> > 2 $\sigma$ ( <i>F</i> <sup>2</sup> )], wR( <i>F</i> <sup>2</sup> ), <i>S</i> | 0.080, 0.220, 1.03                                                      |
| No. of parameters                                                                                               | 236                                                                     |

**Table S2** Selected bond lengths (Å) angles (°) for **1** and **4b**.

|                                 | <b>1</b>  | <b>4b</b> |
|---------------------------------|-----------|-----------|
| <b>Ru-O</b>                     | 2.045(1)  | 2.004 (3) |
|                                 | 2.009(1)  | 2.004 (3) |
|                                 | 2.008(1)  | 2.058 (4) |
|                                 | 2.008(1)  | 2.058 (4) |
|                                 | 2.009(1)  | 2.024 (4) |
|                                 | 2.045(1)  | 2.024 (4) |
| <b>O-Ru-O</b><br>(chelate ring) | 79.32 (4) | 79.26 (1) |
|                                 | 79.31(5)  | 79.26 (1) |
|                                 | 80.94(6)  | 79.6(2)   |

## ESI mass spectra

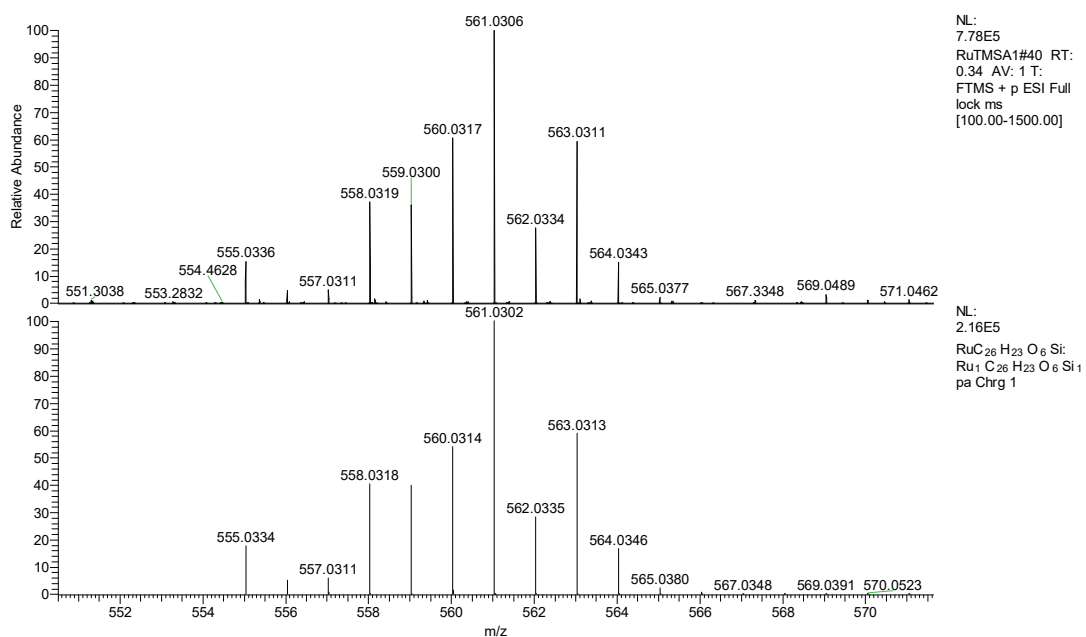

**Figure S2** Experimental isotopic pattern of **3a** (top) and theoretical isotopic pattern for  $[C_{26}H_{23}O_6SiRu]^+$  (bottom).

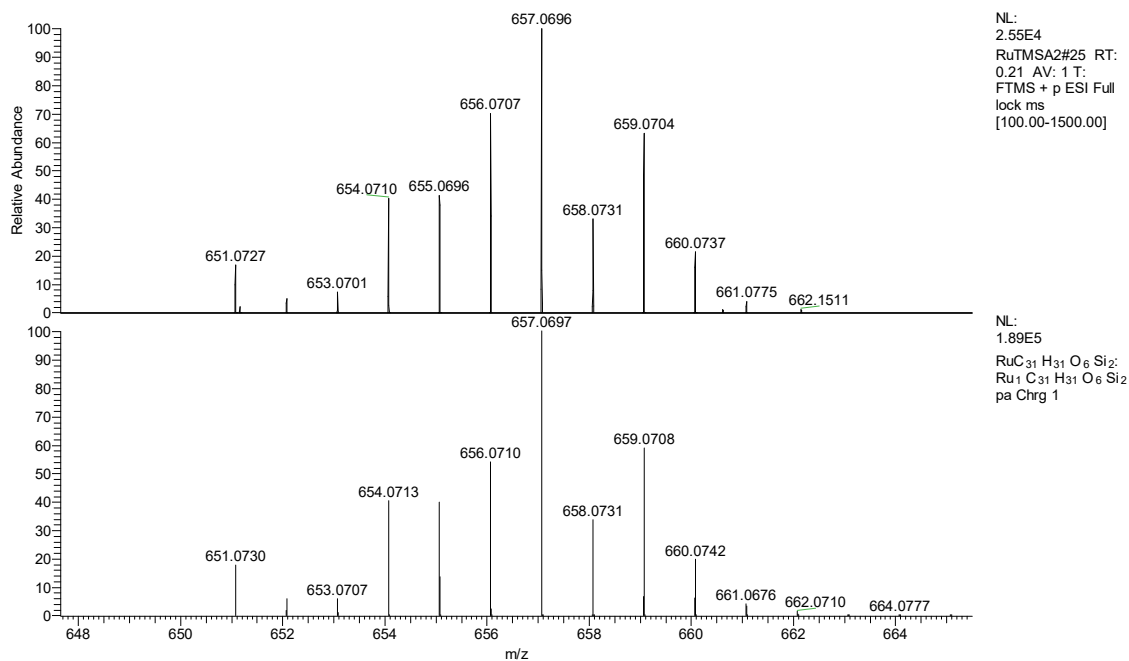

**Figure S3** Experimental isotopic pattern of **3b** (top) and theoretical isotopic pattern for  $[C_{31}H_{31}O_6Si_2Ru]^+$  (bottom).

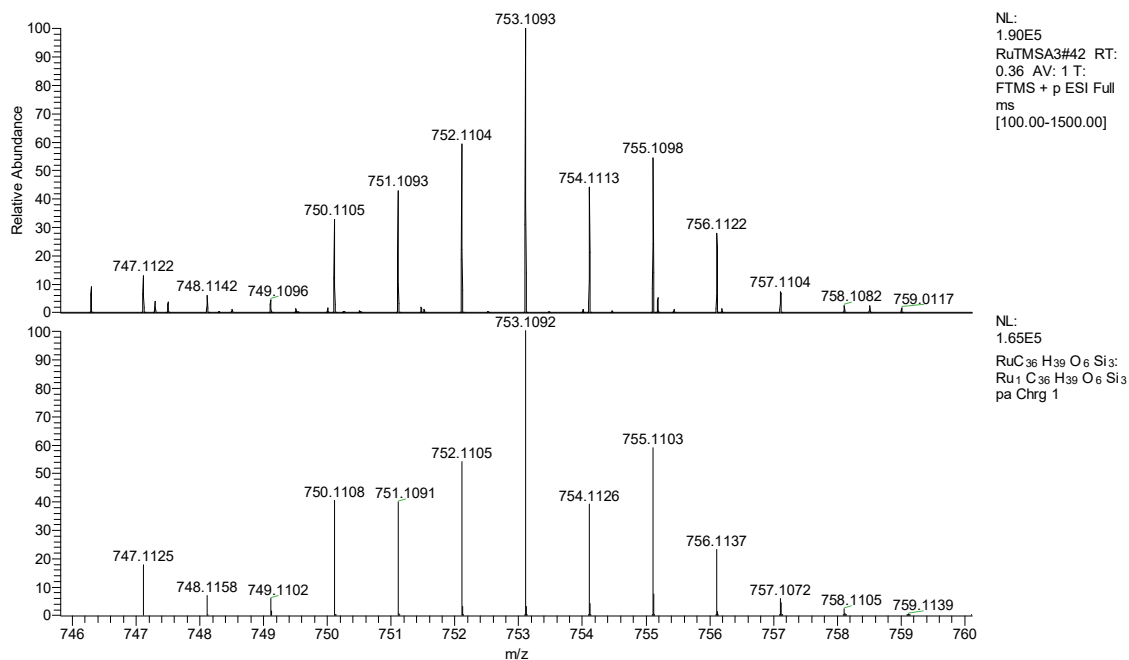

**Figure S4** Experimental isotropic pattern of **3c** (top) and theoretical isotropic pattern for  $[C_{36}H_{39}O_6Si_3Ru]^+$  (bottom).

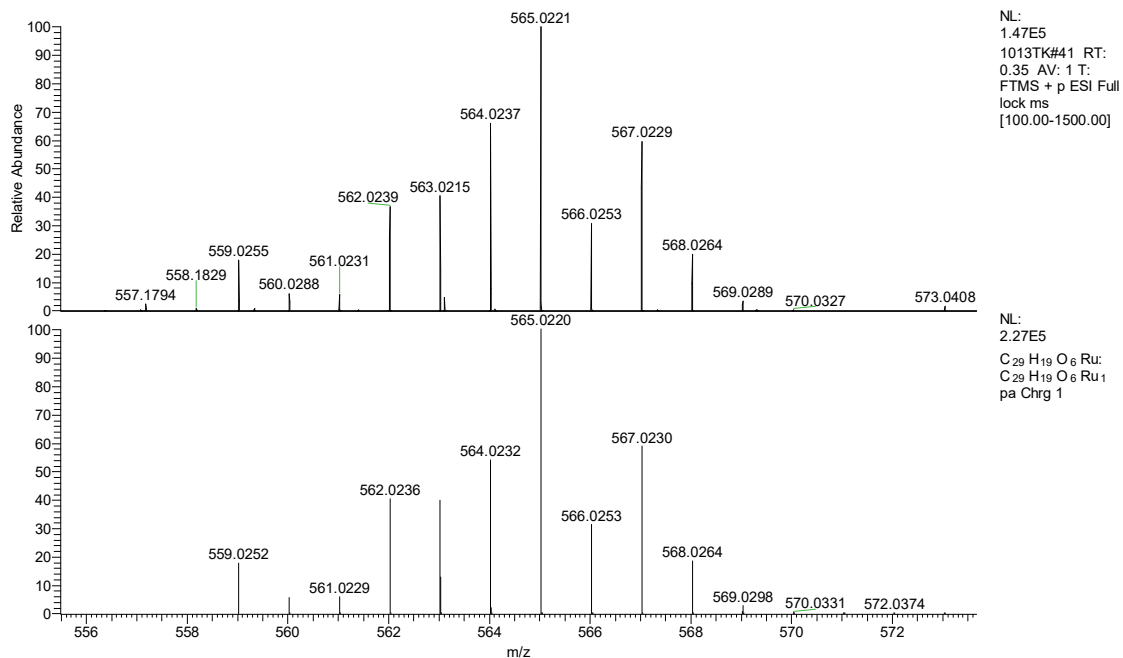

**Figure S5** Experimental isotropic pattern of **4a** (top) and theoretical isotropic pattern for  $[C_{29}H_{19}O_6Ru]^+$  (bottom).

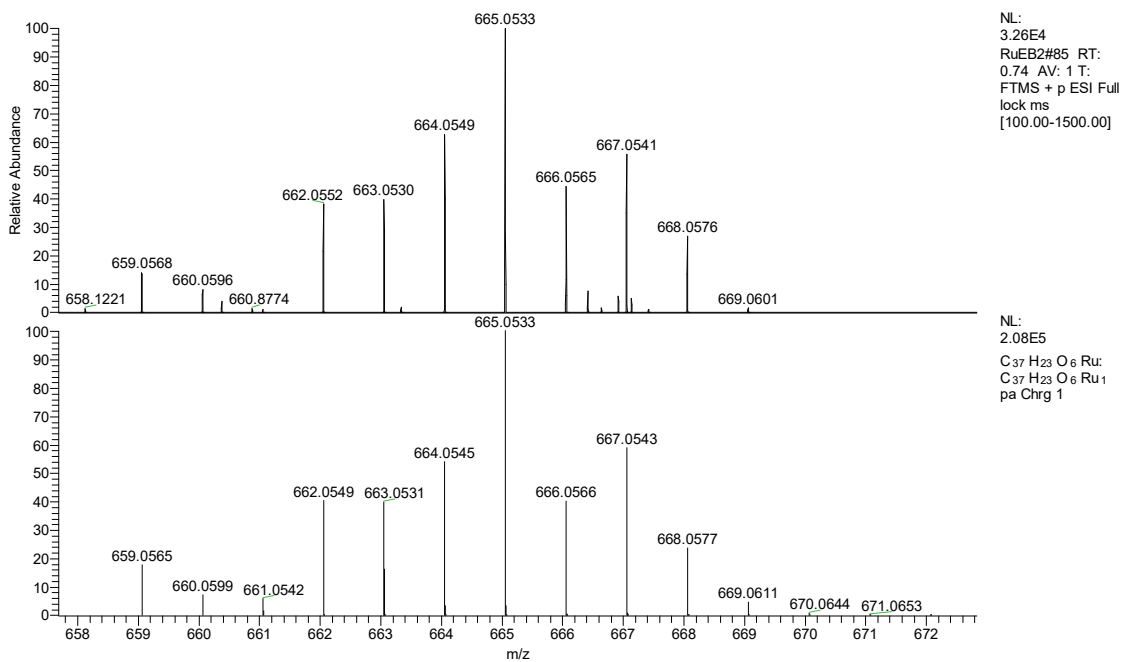

**Figure S6** Experimental isotopic pattern of **4b** (top) and theoretical isotopic pattern for  $[C_{37}H_{23}O_6Ru]^+$  (bottom).

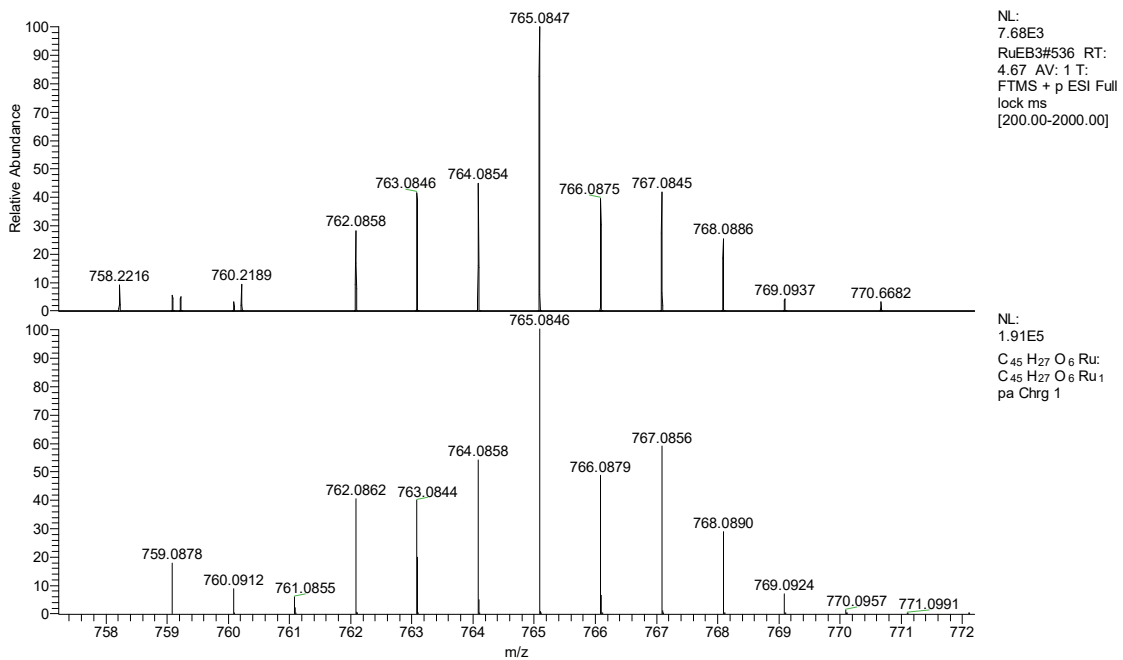

**Figure S7** Experimental isotopic pattern of **4c** (top) and theoretical isotopic pattern for  $[C_{45}H_{27}O_6Ru]^+$  (bottom).

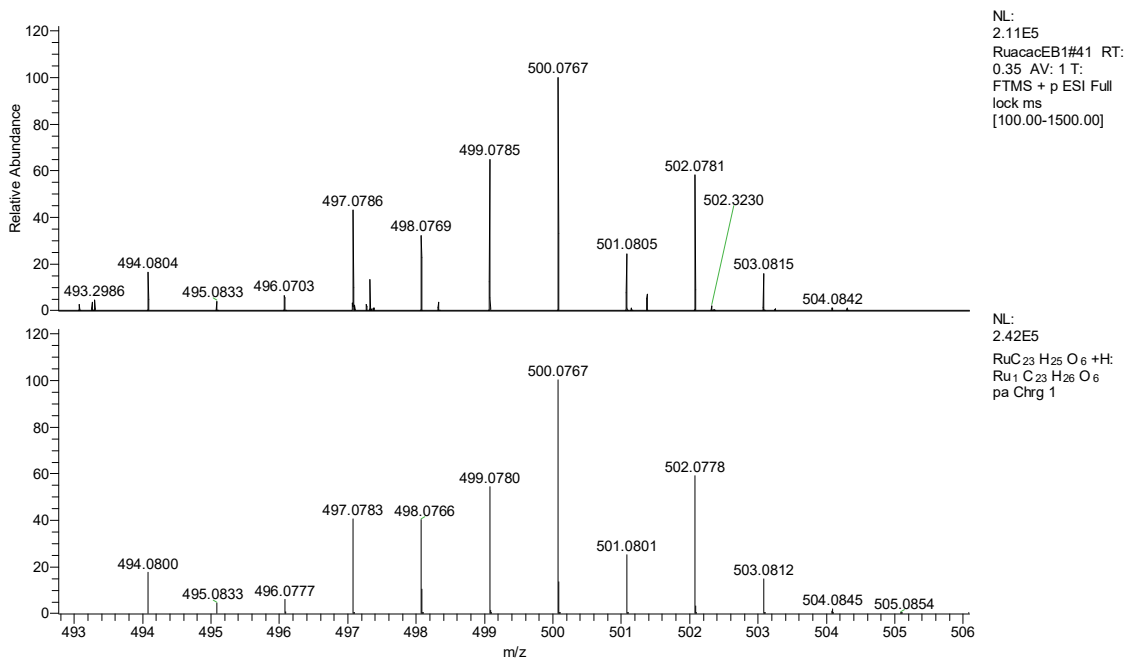

**Figure S8** Experimental isotopic pattern of **6a** (top) and theoretical isotopic pattern for  $[C_{23}H_{25}O_6Ru + H]^+$  (bottom).

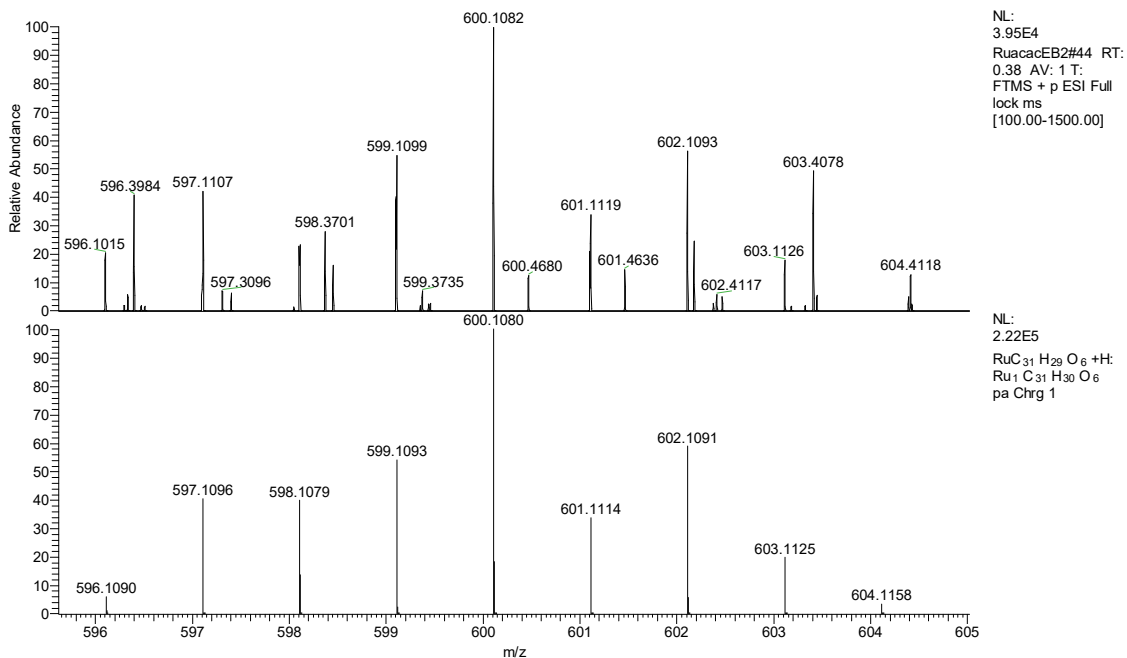

**Figure S9** Experimental isotopic pattern of **6b** (top) and theoretical isotopic pattern for  $[C_{31}H_{29}O_6Ru + H]^+$  (bottom).

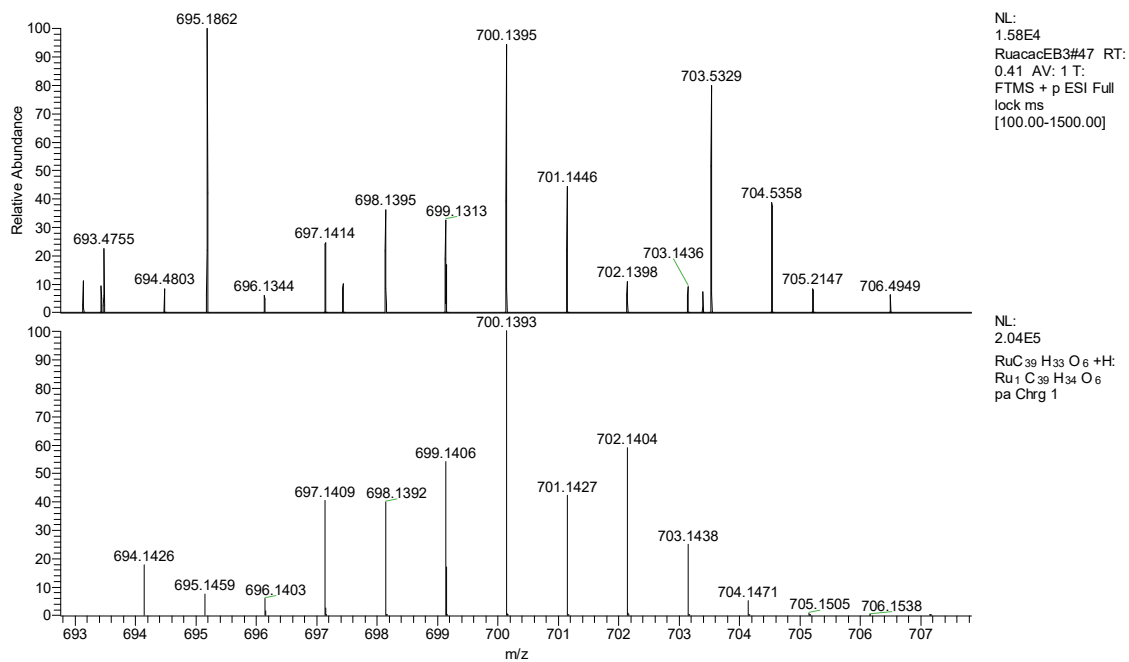

**Figure S10** Experimental isotopic pattern of **6c** (top) and theoretical isotopic pattern for  $[C_{39}H_{33}O_6Ru + H]^+$  (bottom).



# <sup>1</sup>H NMR Spectra

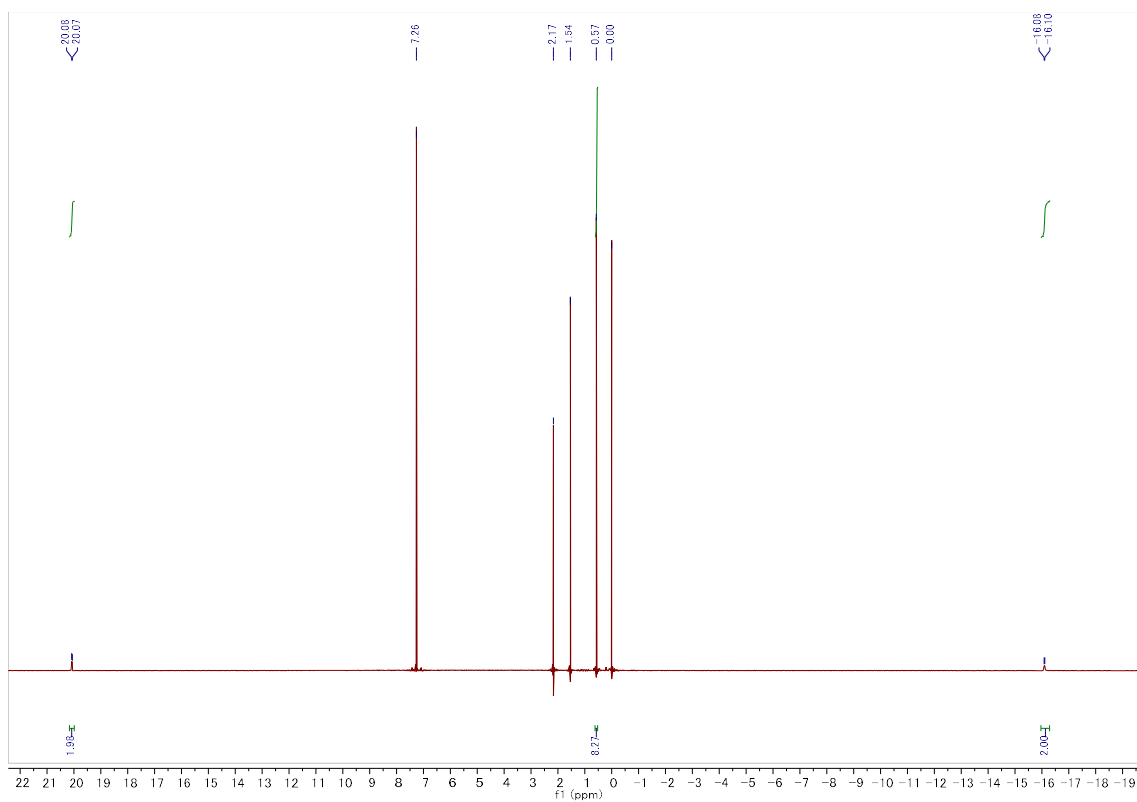

**Figure S11** <sup>1</sup>H NMR spectrum of **3c** measured in CDCl<sub>3</sub>.

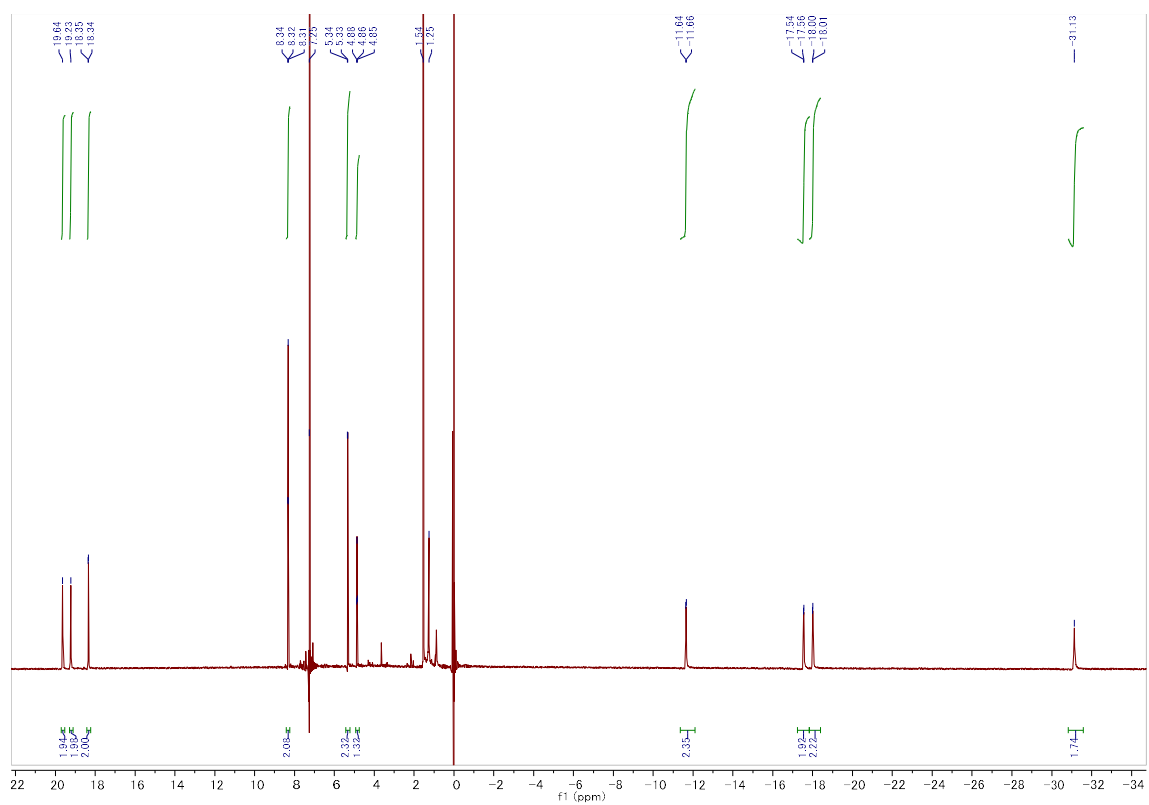

**Figure S12**  $^1\text{H}$  NMR spectrum of **4a** measured in  $\text{CDCl}_3$ .

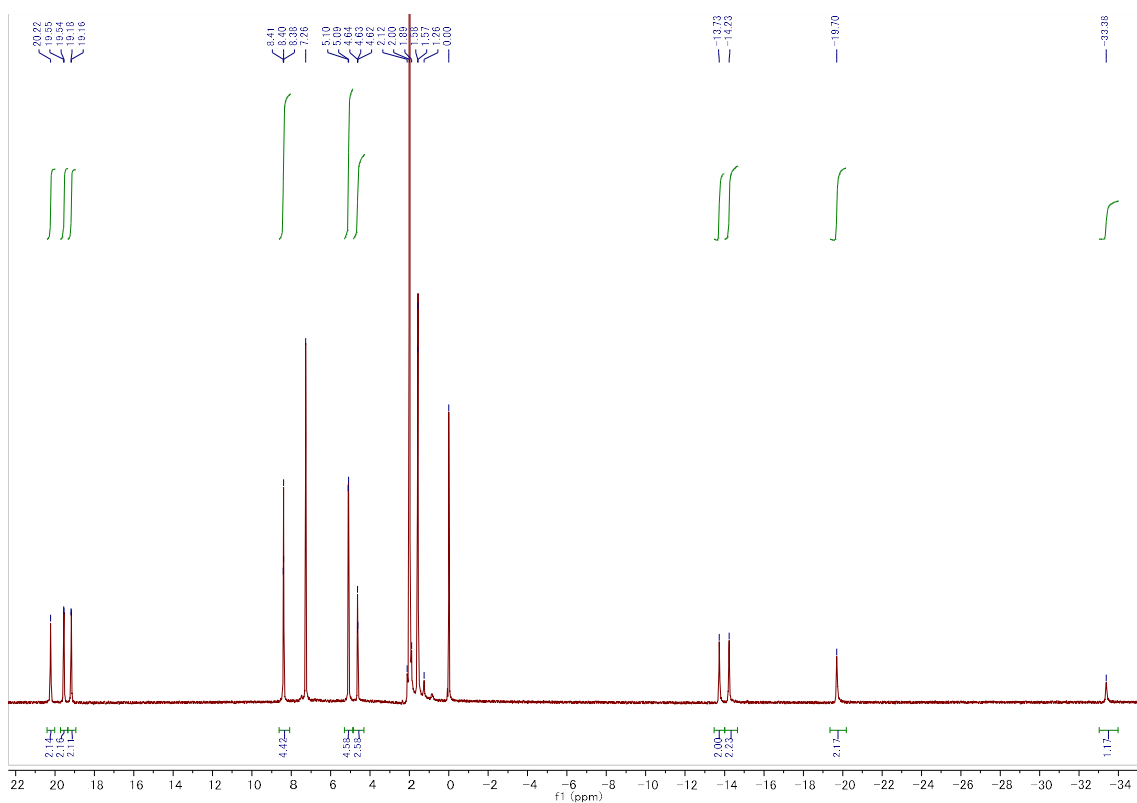

**Figure S13**  $^1\text{H}$  NMR spectrum of **4b** measured in  $\text{CDCl}_3$ .

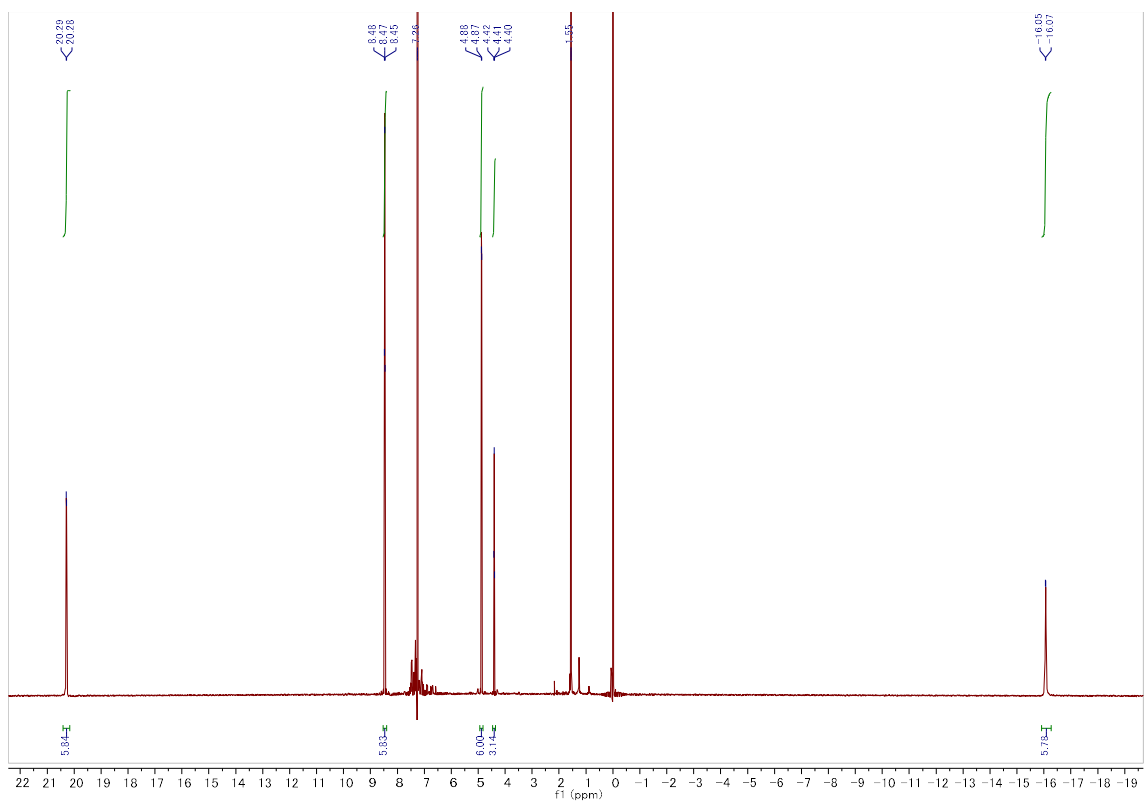

**Figure S14**  $^1\text{H}$  NMR spectrum of **4c** measured in  $\text{CDCl}_3$ .

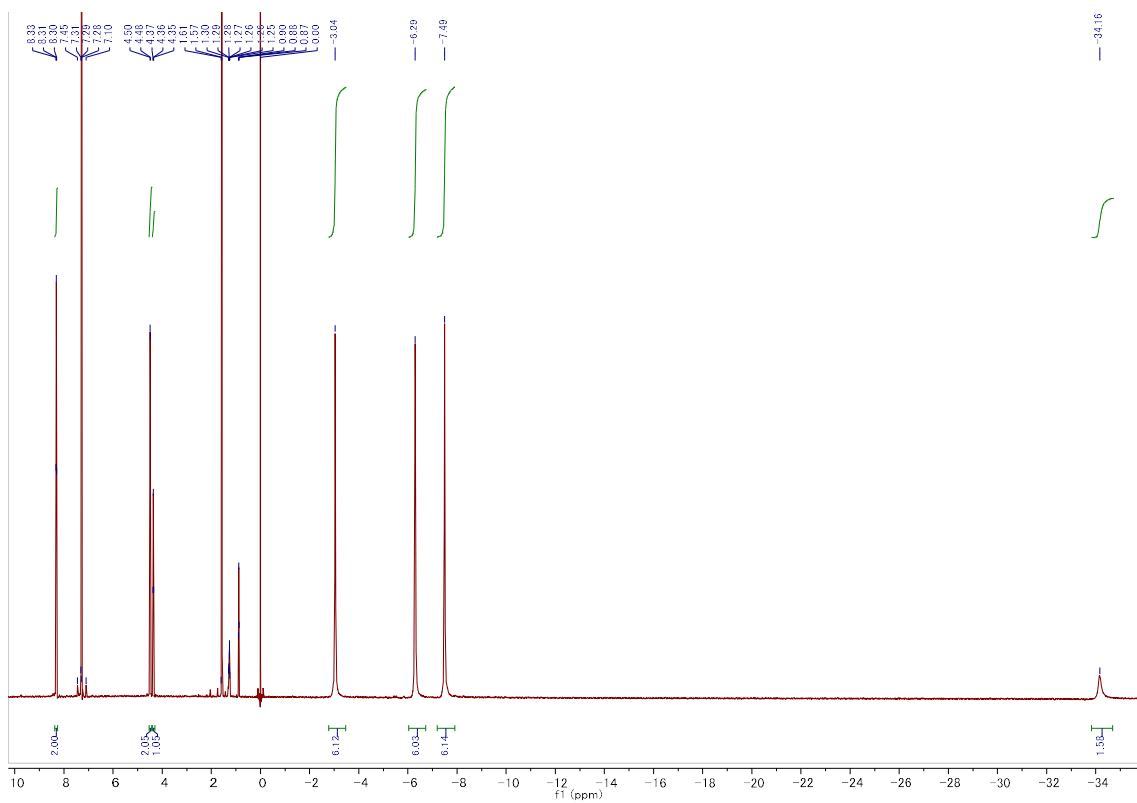

**Figure S15**  $^1\text{H}$  NMR spectrum of **6a** measured in  $\text{CDCl}_3$ .

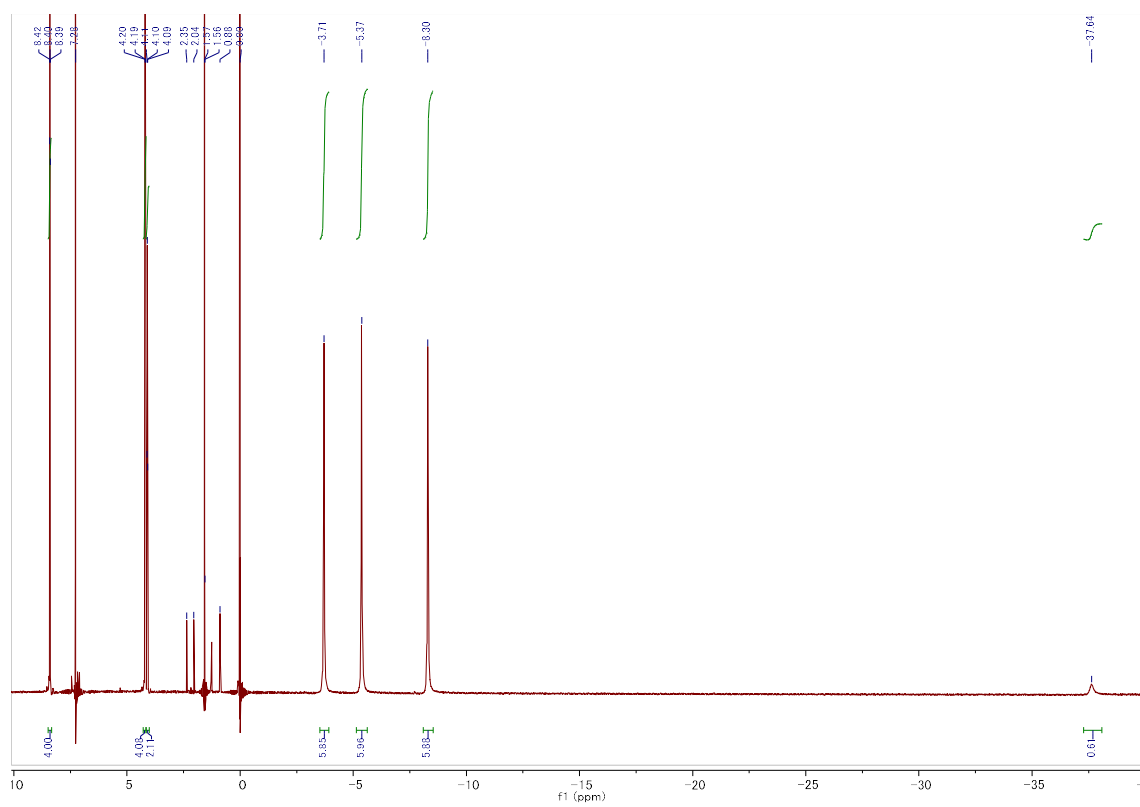

Figure S16  $^1\text{H}$  NMR spectrum of **6b** measured in  $\text{CDCl}_3$ .

## UV-vis-NIR spectra

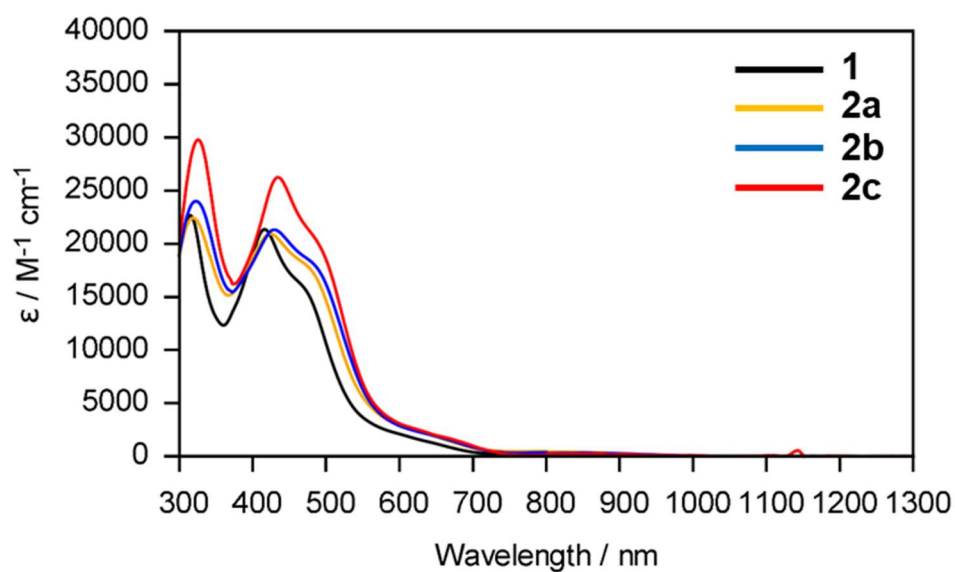

Figure S17 UV-Vis-NIR spectra of 1, 2a, 2b, and 2c measured in  $\text{CH}_2\text{Cl}_2$ .

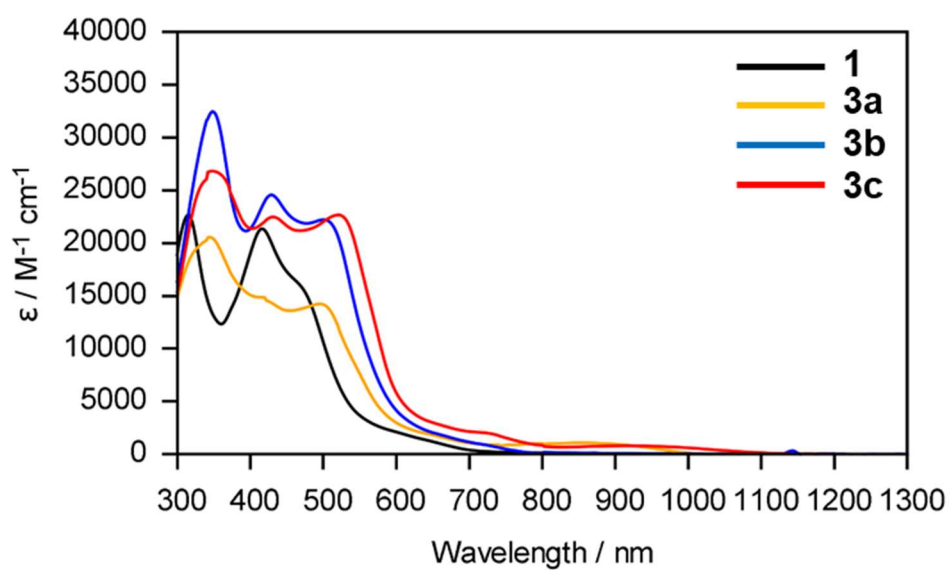

Figure S18 UV-Vis-NIR spectra of 1, 3a, 3b, and 3c measured in  $\text{CH}_2\text{Cl}_2$ .

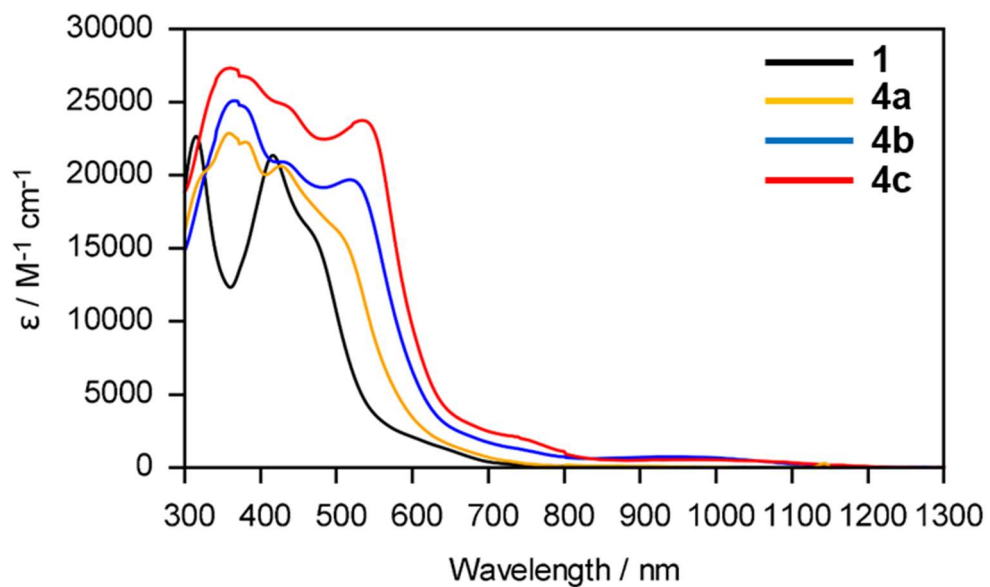

**Figure S19** UV-Vis-NIR spectra of **1**, **4a**, **4b**, and **4c** measured in CH<sub>2</sub>Cl<sub>2</sub>.

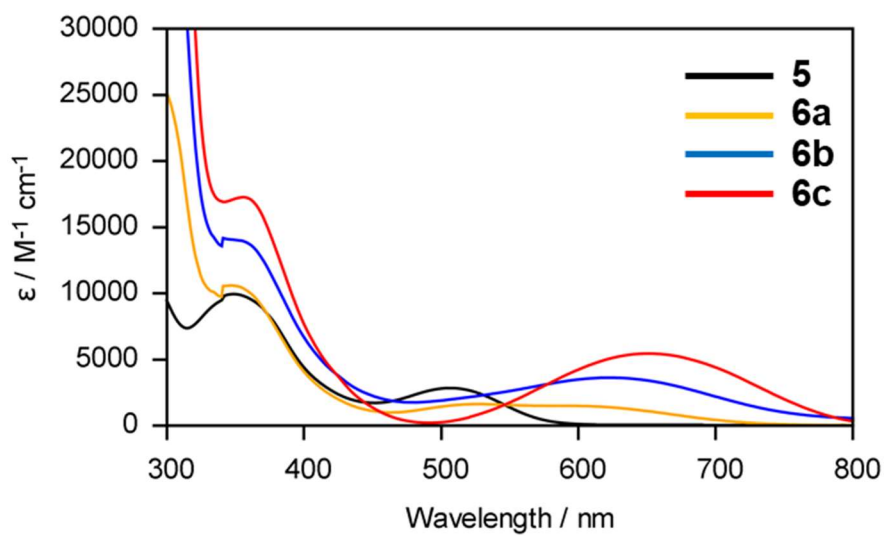

**Figure S20** UV-Vis-NIR spectra of **5**, **6a**, **6b** and **6c** measured in CH<sub>2</sub>Cl<sub>2</sub>.



### Cyclic voltammograms

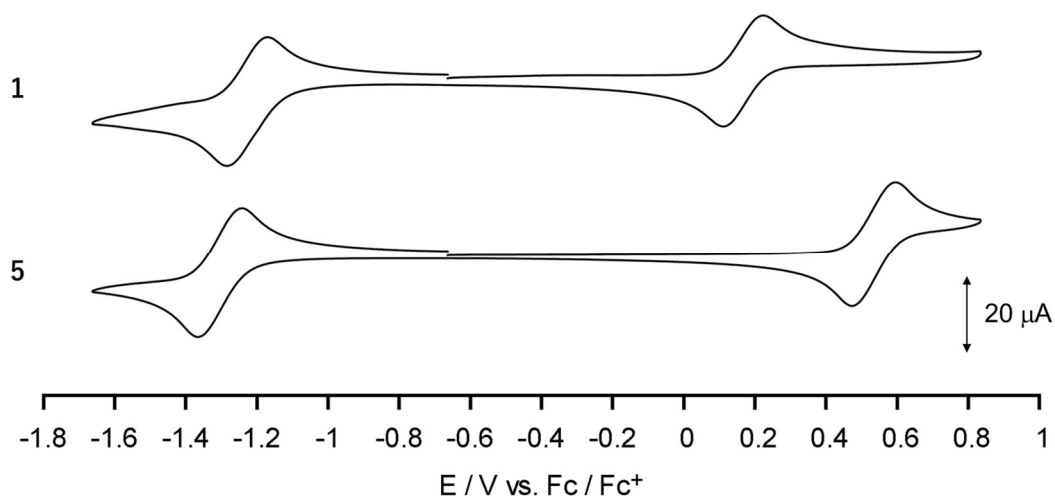

**Figure S21** Cyclic voltammograms of **1** and **5** ( $1.0 \text{ mmol dm}^{-3}$ ) in  $0.10 \text{ mol dm}^{-3} [\text{Bu}_4\text{N}](\text{ClO}_4)\text{-CH}_2\text{Cl}_2$ . The scan rate is  $100 \text{ mV s}^{-1}$ .

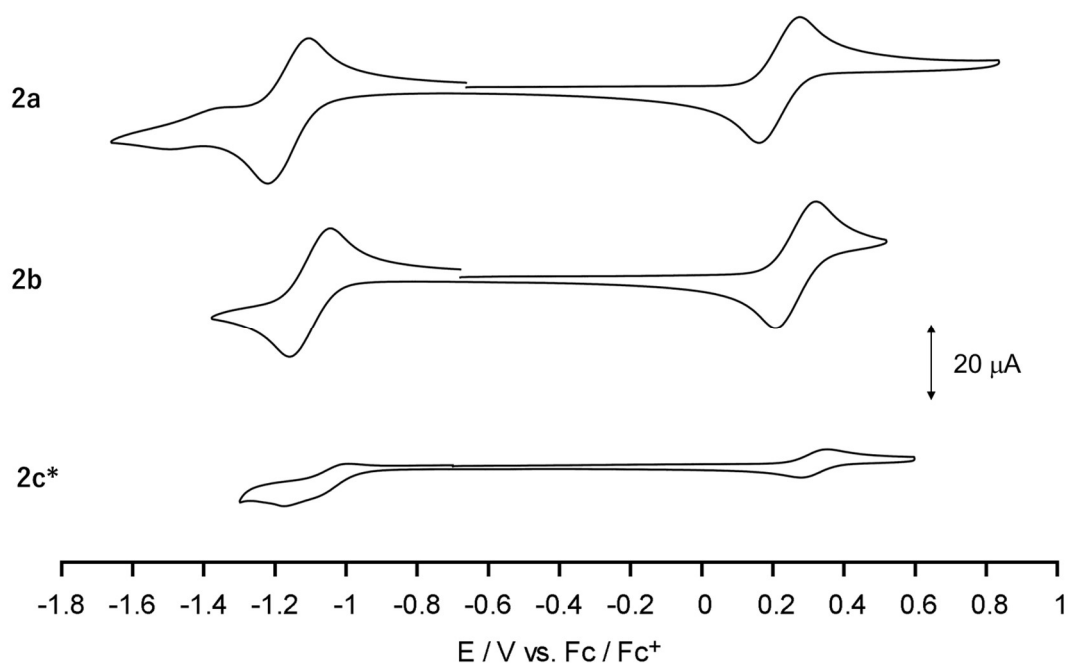

**Figure S22** Cyclic voltammograms of **2a** ~ **2c** (**2a** and **2b**:  $1.0 \text{ mmol dm}^{-3}$ , **2c**:  $0.16 \text{ mmol dm}^{-3}$ ) in  $0.1 \text{ mol dm}^{-3} [\text{Bu}_4\text{N}](\text{ClO}_4)\text{-CH}_2\text{Cl}_2$ . The scan rate is  $100 \text{ mV s}^{-1}$ .

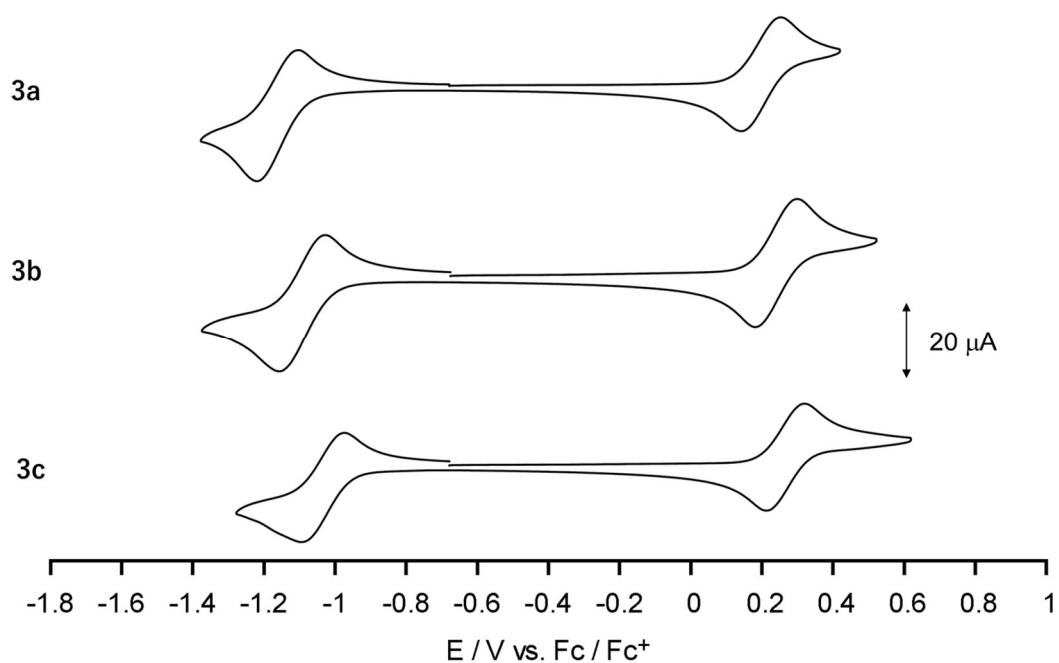

**Figure S23** Cyclic voltammograms of **3a** ~ **3c** ( $1.0 \text{ mmol dm}^{-3}$ ) in  $0.10 \text{ mol dm}^{-3}$   $[\text{Bu}_4\text{N}](\text{ClO}_4)$ - $\text{CH}_2\text{Cl}_2$ . The scan rate is  $100 \text{ mV s}^{-1}$ .

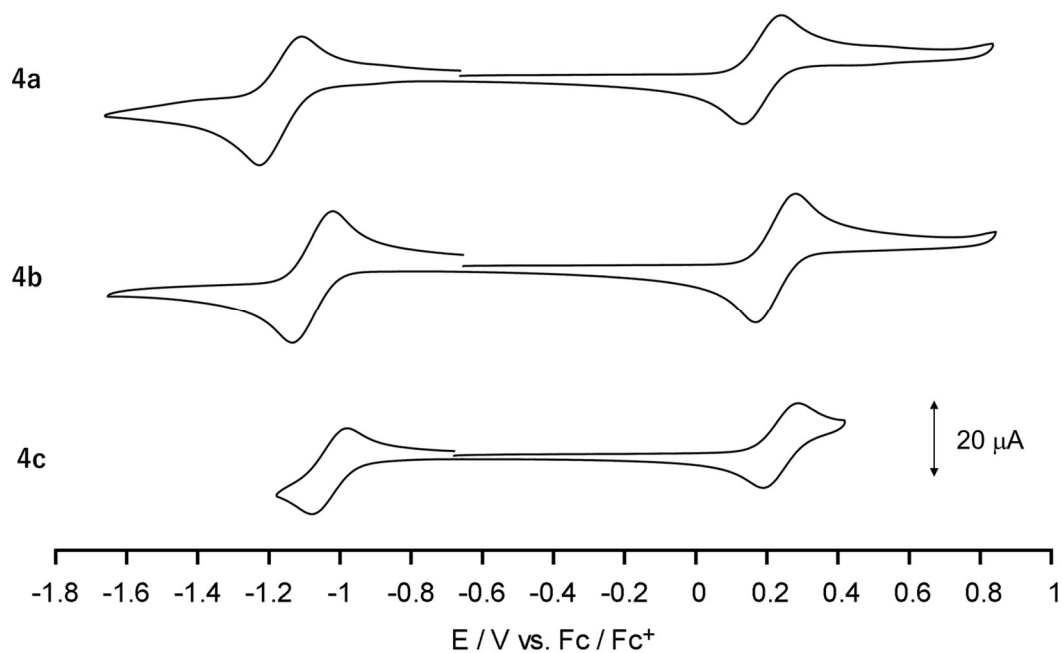

**Figure S24** Cyclic voltammograms of **4a** ~ **4c** ( $1.0 \text{ mmol dm}^{-3}$ ) in  $0.10 \text{ mol dm}^{-3}$   $[\text{Bu}_4\text{N}](\text{ClO}_4)$ - $\text{CH}_2\text{Cl}_2$ . The scan rate is  $100 \text{ mV s}^{-1}$ .

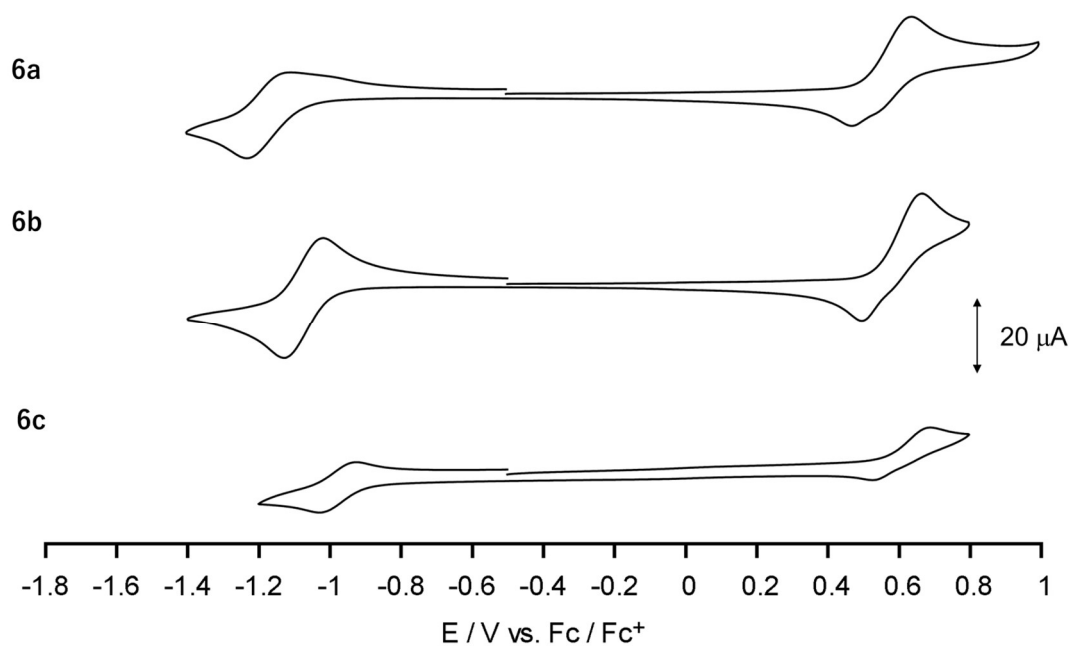

**Figure S25** Cyclic voltammograms of **6a** ~ **6c** ( $1.0 \text{ mmol dm}^{-3}$ ) in  $0.10 \text{ mol dm}^{-3}$   $[\text{Bu}_4\text{N}](\text{ClO}_4)$ - $\text{CH}_2\text{Cl}_2$ . The scan rate is  $100 \text{ mV s}^{-1}$ .

## $\Delta E$ values of related complexes

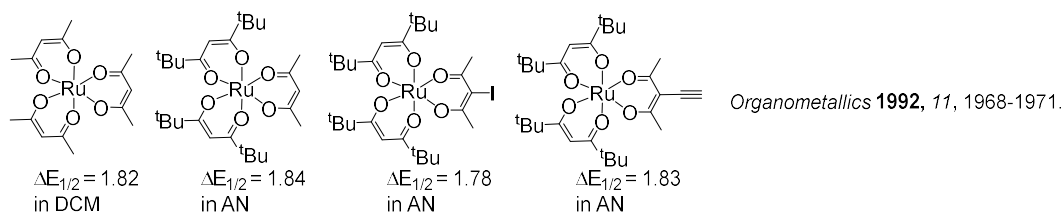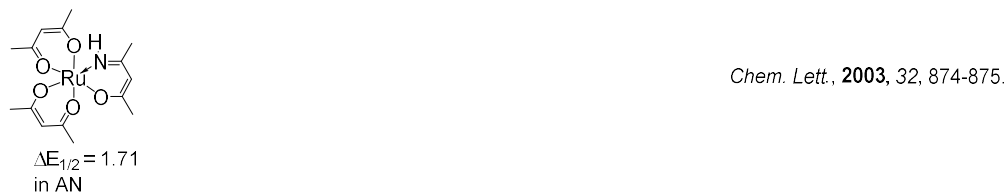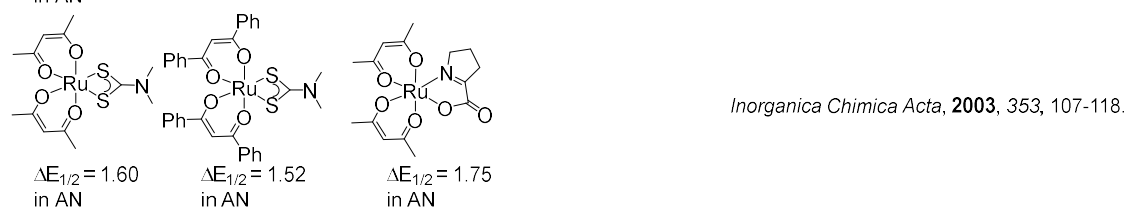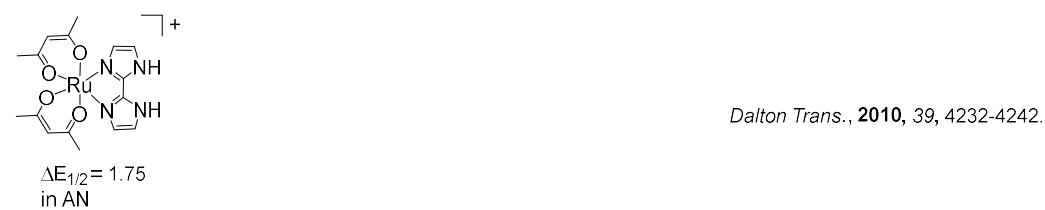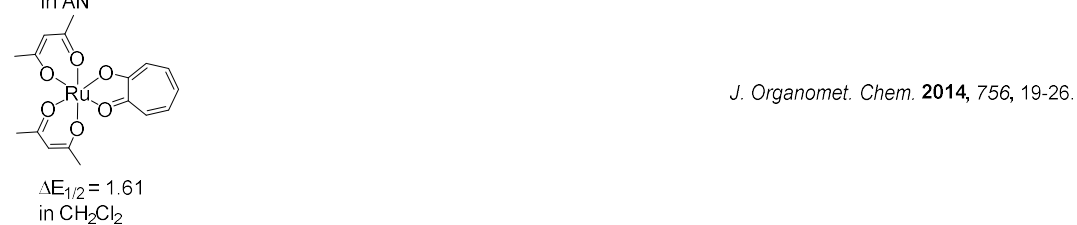

**Figure S26**  $\Delta E = E_{1/2}(\text{Ru}^{\text{III}}/\text{Ru}^{\text{IV}}) - E_{1/2}(\text{Ru}^{\text{II}}/\text{Ru}^{\text{III}})$  values of  $[\text{Ru}(\text{acac})_3]$  and its selected derivatives based on the reported articles.<sup>4-8</sup>

### Spectroelectrochemical study (electrochemical reduction)

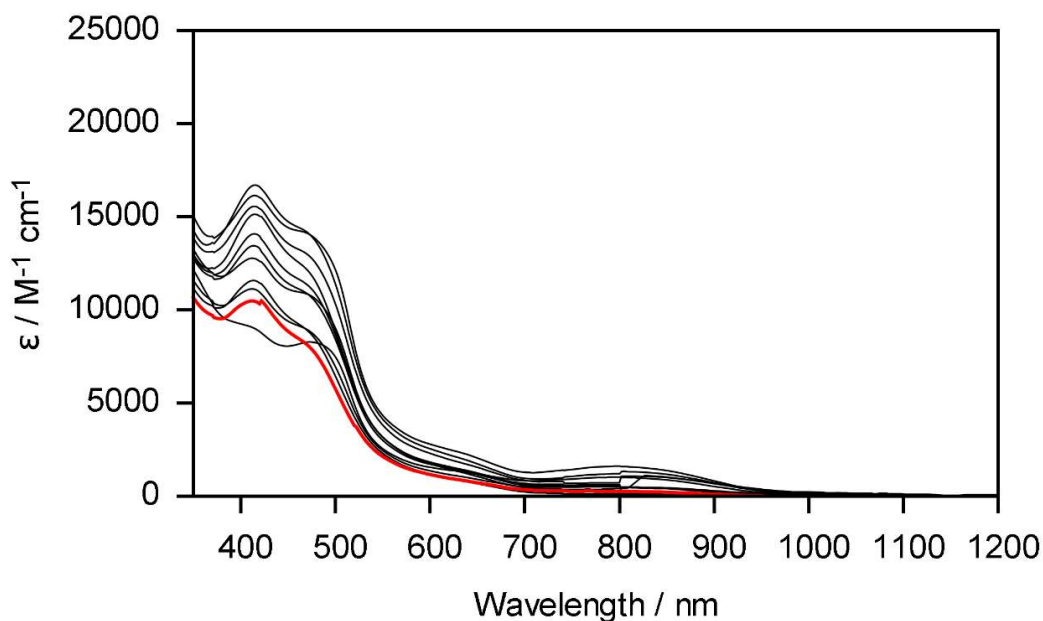

**Figure S27** UV-Vis-NIR spectral changes of **1** (0.5 mM in  $\text{CH}_2\text{Cl}_2$  with 0.05 M  $n\text{Bu}_4\text{NClO}_4$ ) on the application of -1.30 V vs.  $\text{Ag}/\text{Ag}^+$ . The measurements were performed every 3 minutes. The red line corresponds to the last measured spectrum.

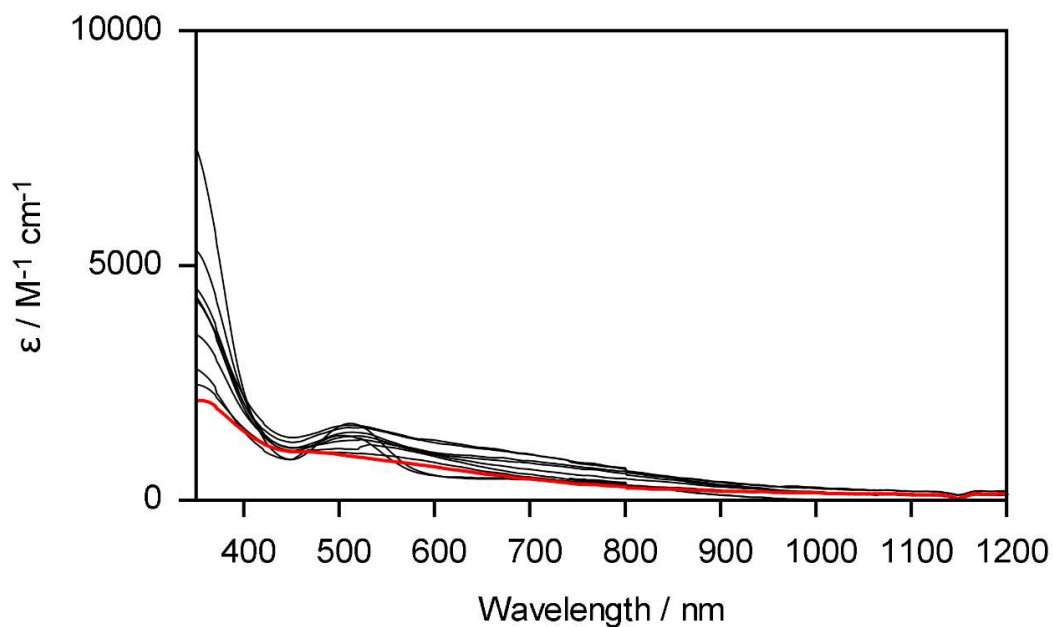

**Figure S28** UV-Vis-NIR spectral changes of **5** (0.5 mM in  $\text{CH}_2\text{Cl}_2$  with 0.05 M  $n\text{Bu}_4\text{NClO}_4$ ) on the application of -1.30 V vs.  $\text{Ag}/\text{Ag}^+$ . The measurements were performed every 3 minutes. The red line corresponds to the last measured spectrum.

### Spectroelectrochemical study (electrochemical oxidation)

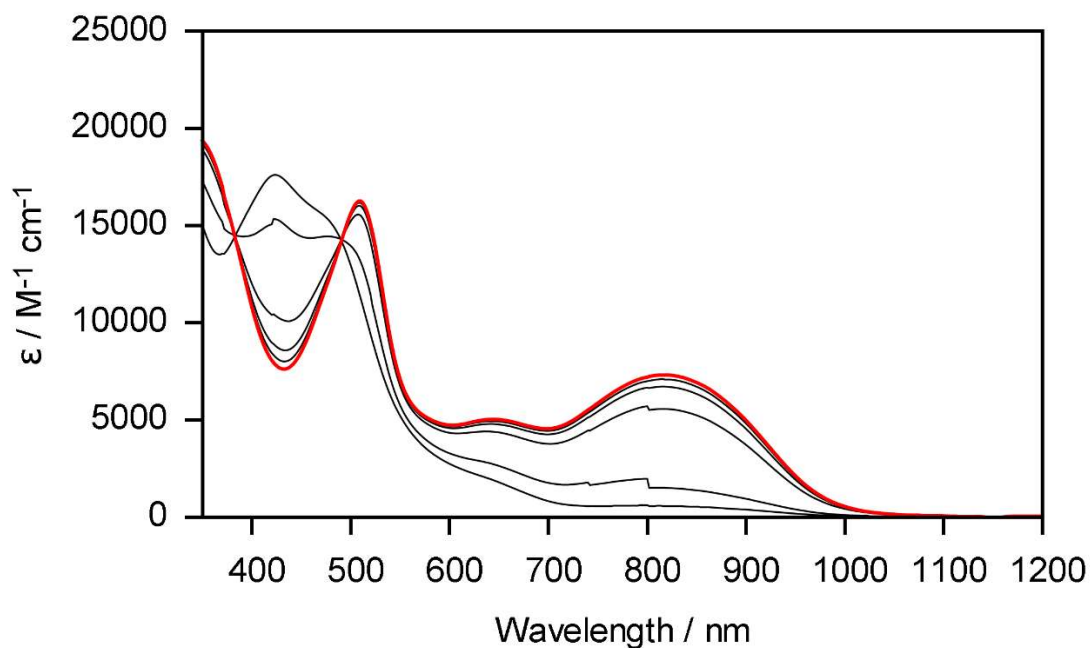

**Figure S29** UV-Vis-NIR spectral changes of **2a** (0.5 mM in  $\text{CH}_2\text{Cl}_2$  with 0.05 M  $n\text{Bu}_4\text{NClO}_4$ ) on the application of 0.60 V vs.  $\text{Ag}/\text{Ag}^+$ . The measurements were performed every 3 minutes. The red line corresponds to the equilibrated state.

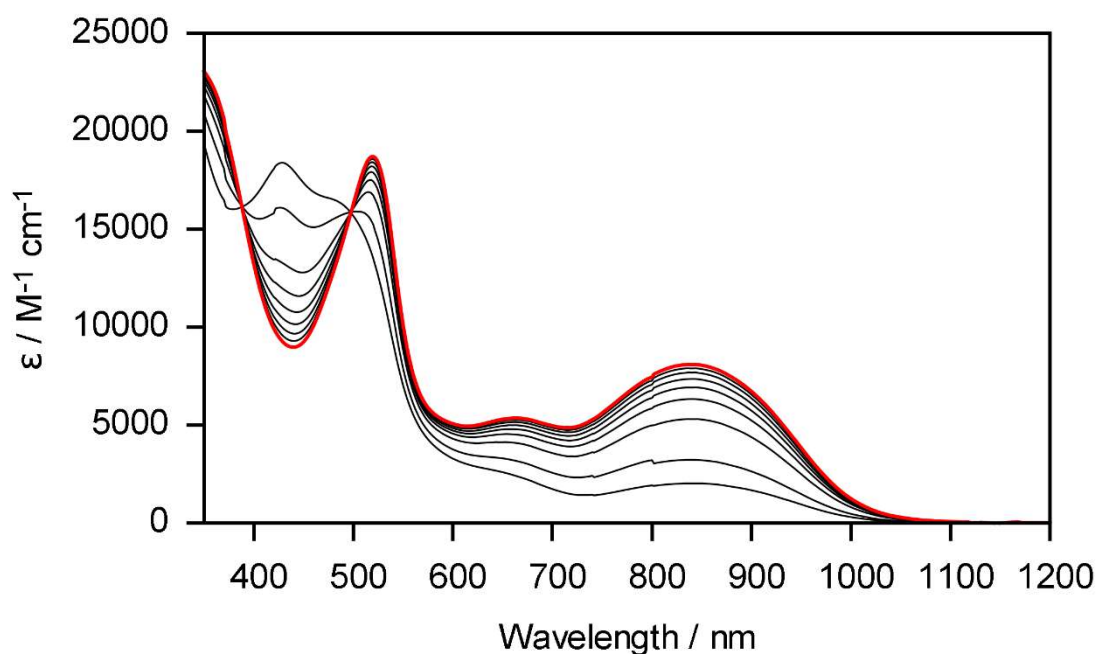

**Figure S30** UV-Vis-NIR spectral changes of **2b** (0.5 mM in  $\text{CH}_2\text{Cl}_2$  with 0.05 M  $n\text{Bu}_4\text{NClO}_4$ ) on the application of 0.54 V vs.  $\text{Ag}/\text{Ag}^+$ . The measurements were performed every 3 minutes. The red line corresponds to the equilibrated state.

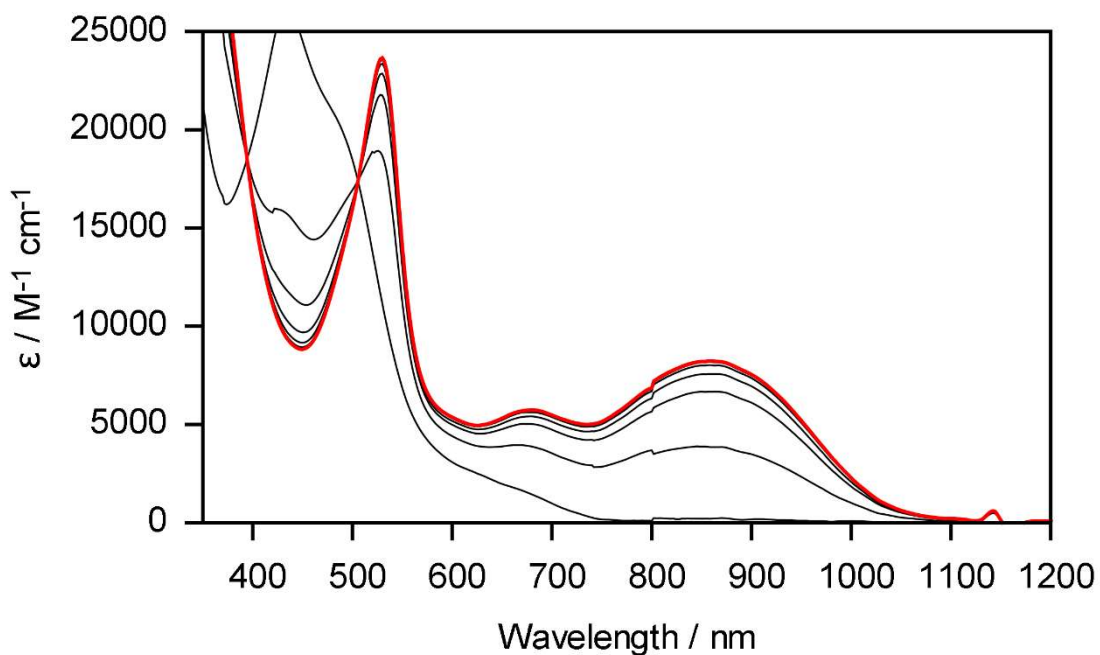

**Figure S31** UV-Vis-NIR spectral changes of **2c** (0.16 mM in CH<sub>2</sub>Cl<sub>2</sub> with 0.05 M <sup>n</sup>Bu<sub>4</sub>NClO<sub>4</sub>) on the application of 0.60 V vs. Ag/Ag<sup>+</sup>. The measurements were performed every 3 minutes. The red line corresponds to the equilibrated state.

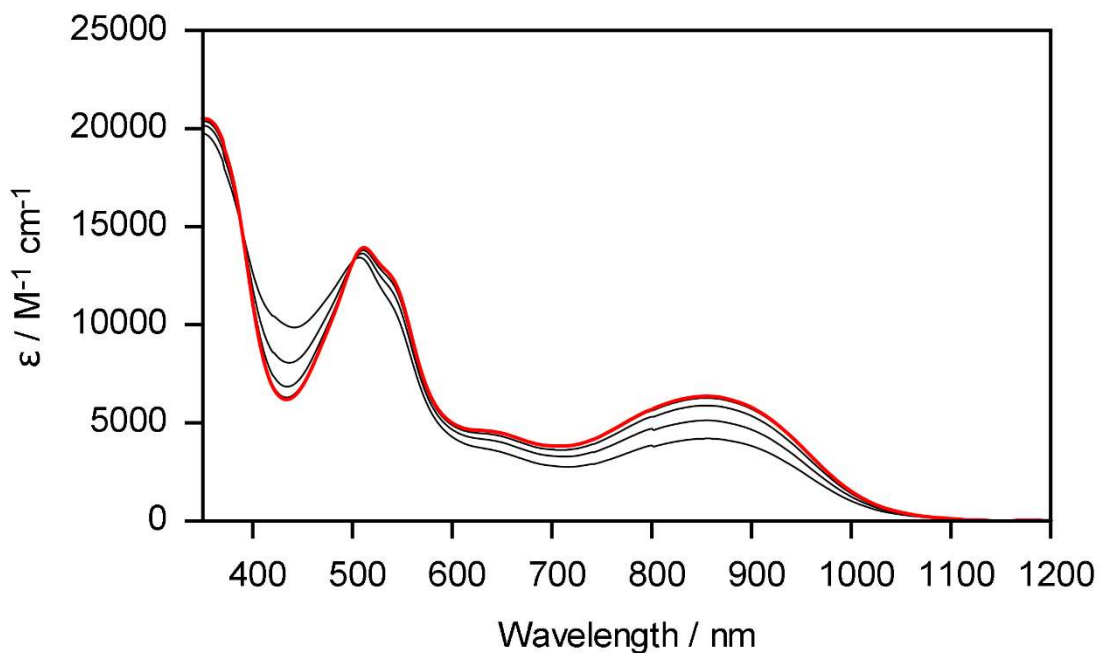

**Figure S32** UV-Vis-NIR spectral changes of **3a** (0.5 mM in CH<sub>2</sub>Cl<sub>2</sub> with 0.05 M <sup>n</sup>Bu<sub>4</sub>NClO<sub>4</sub>) on the application of 0.60 V vs. Ag/Ag<sup>+</sup>. The measurements were performed every 3 minutes. The red line corresponds to the equilibrated state.

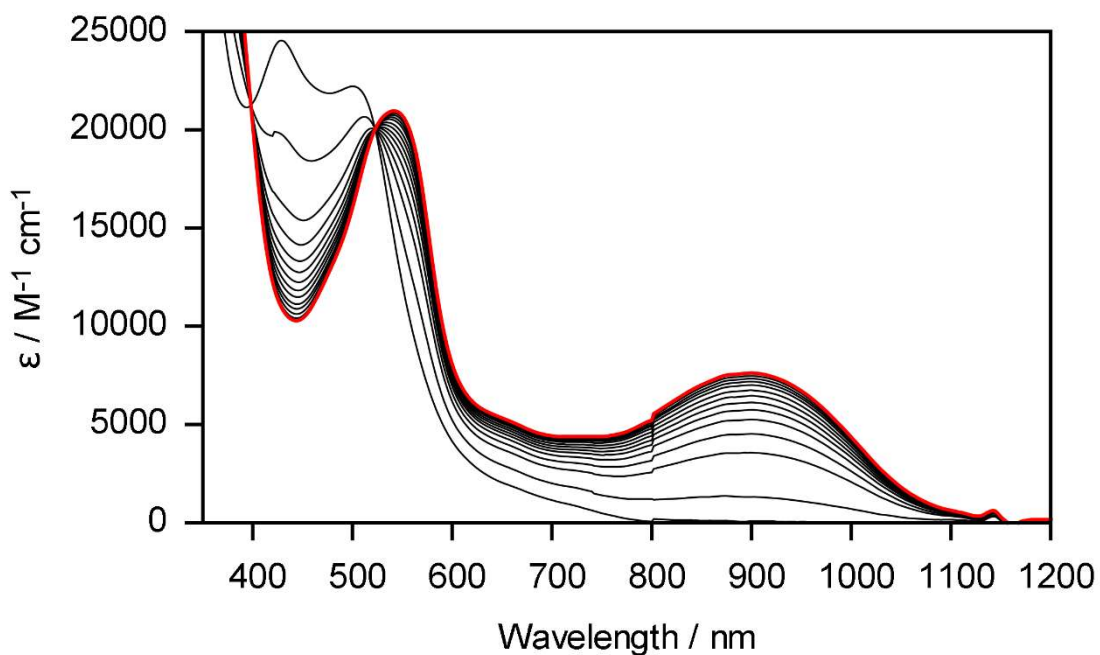

**Figure S33** UV-Vis-NIR spectral changes of **3b** (0.25 mM in CH<sub>2</sub>Cl<sub>2</sub> with 0.05 M <sup>n</sup>Bu<sub>4</sub>NClO<sub>4</sub>) on the application of 0.60 V vs. Ag/Ag<sup>+</sup>. The measurements were performed every 3 minutes. The red line corresponds to the equilibrated state.

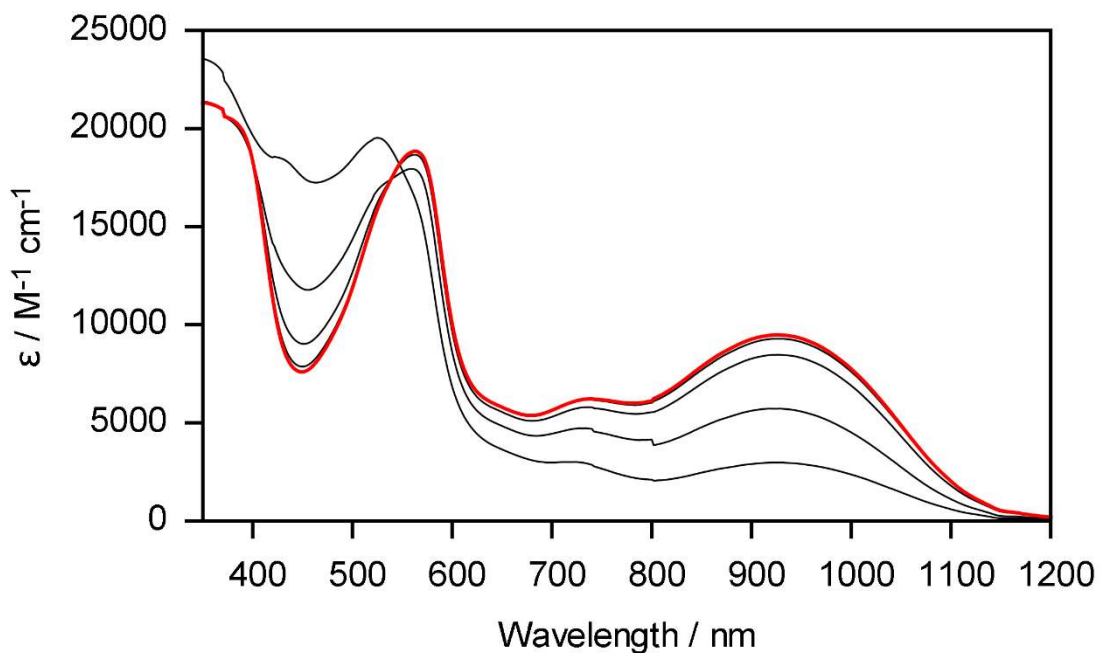

**Figure S34** UV-Vis-NIR spectral changes of **3c** (0.5 mM in CH<sub>2</sub>Cl<sub>2</sub> with 0.05 M <sup>n</sup>Bu<sub>4</sub>NClO<sub>4</sub>) on the application of 0.60 V vs. Ag/Ag<sup>+</sup>. The measurements were performed every 3 minutes. The red line corresponds to the equilibrated state.



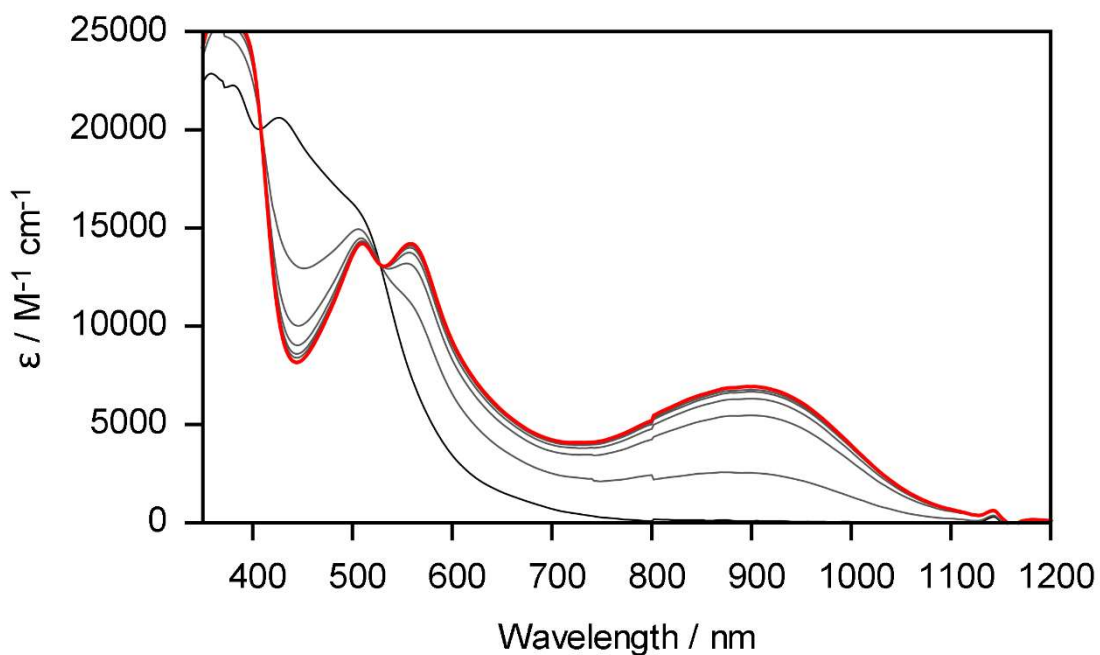

**Figure S35** UV-Vis-NIR spectral changes of **4a** (0.5 mM in CH<sub>2</sub>Cl<sub>2</sub> with 0.05 M <sup>n</sup>Bu<sub>4</sub>NClO<sub>4</sub>) on the application of 0.55 V vs. Ag/Ag<sup>+</sup>. The measurements were performed every 3 minutes. The red line corresponds to the equilibrated state.

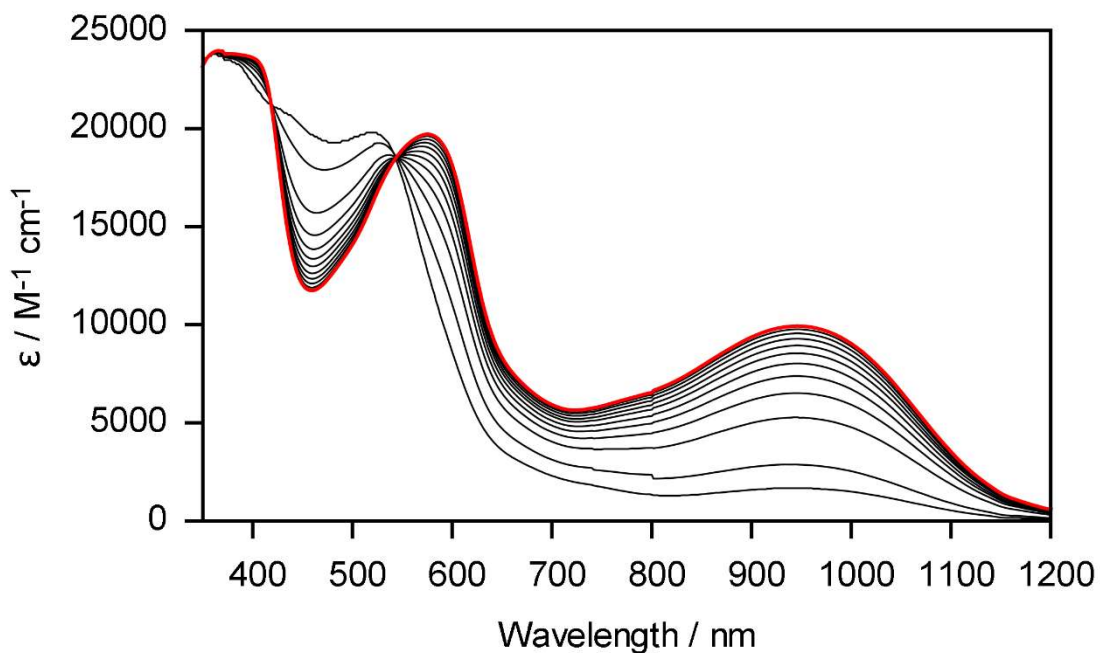

**Figure S36** UV-Vis-NIR spectral changes of **4b** (0.25 mM in CH<sub>2</sub>Cl<sub>2</sub> with 0.05 M <sup>n</sup>Bu<sub>4</sub>NClO<sub>4</sub>) on the application of 0.60 V vs. Ag/Ag<sup>+</sup>. The measurements were performed every 3 minutes. The red line corresponds to the equilibrated state.

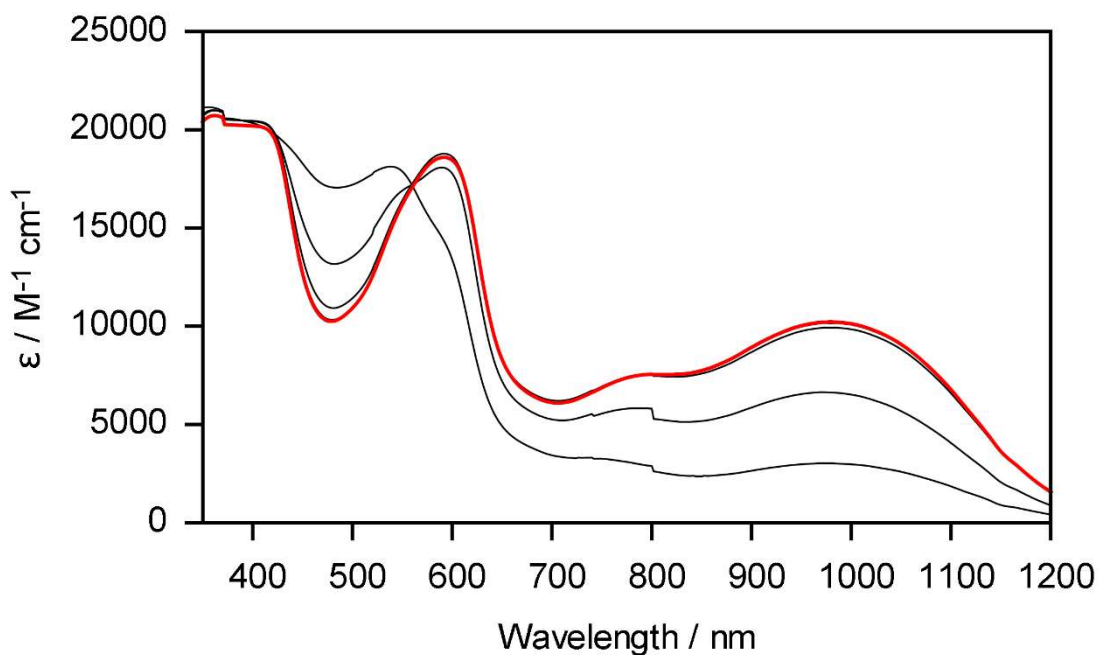

**Figure S37** UV-Vis-NIR spectral changes of **4c** (0.5 mM in CH<sub>2</sub>Cl<sub>2</sub> with 0.05 M <sup>n</sup>Bu<sub>4</sub>NClO<sub>4</sub>) on the application of 0.60 V vs. Ag/Ag<sup>+</sup>. The measurements were performed every 3 minutes. The red line corresponds to the equilibrated state.

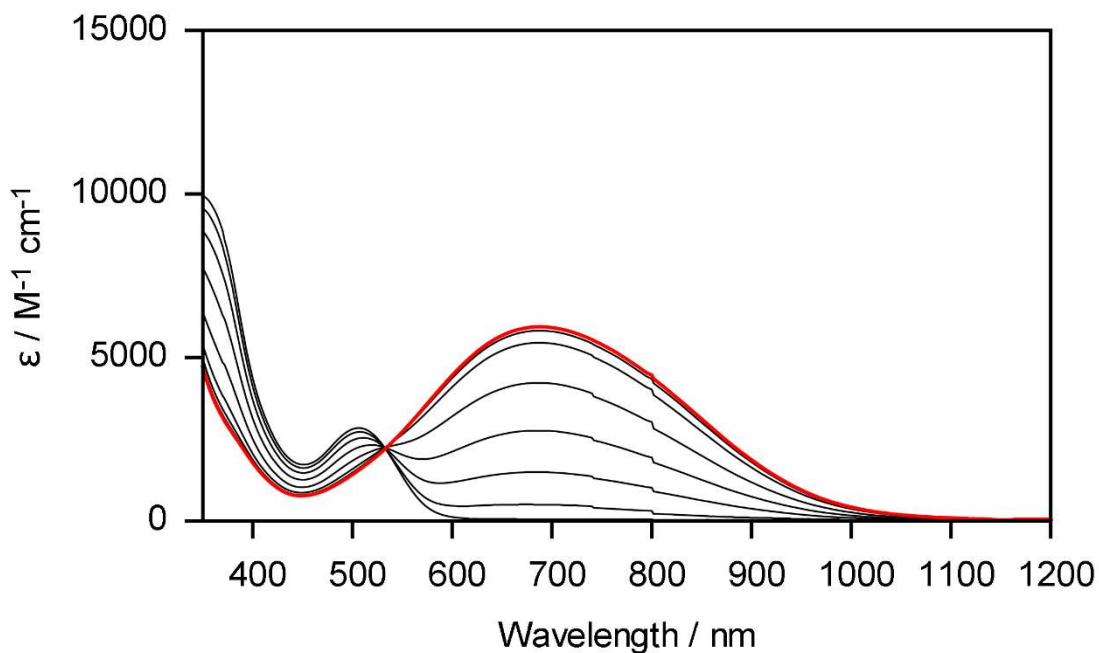

**Figure S38** UV-Vis-NIR spectral changes of **5** (1.0 mM in CH<sub>2</sub>Cl<sub>2</sub> with 0.1 M <sup>n</sup>Bu<sub>4</sub>NClO<sub>4</sub>) on the application of 0.85 V vs. Ag/Ag<sup>+</sup>. The measurements were performed every 3 minutes. The red line corresponds to the equilibrated state.

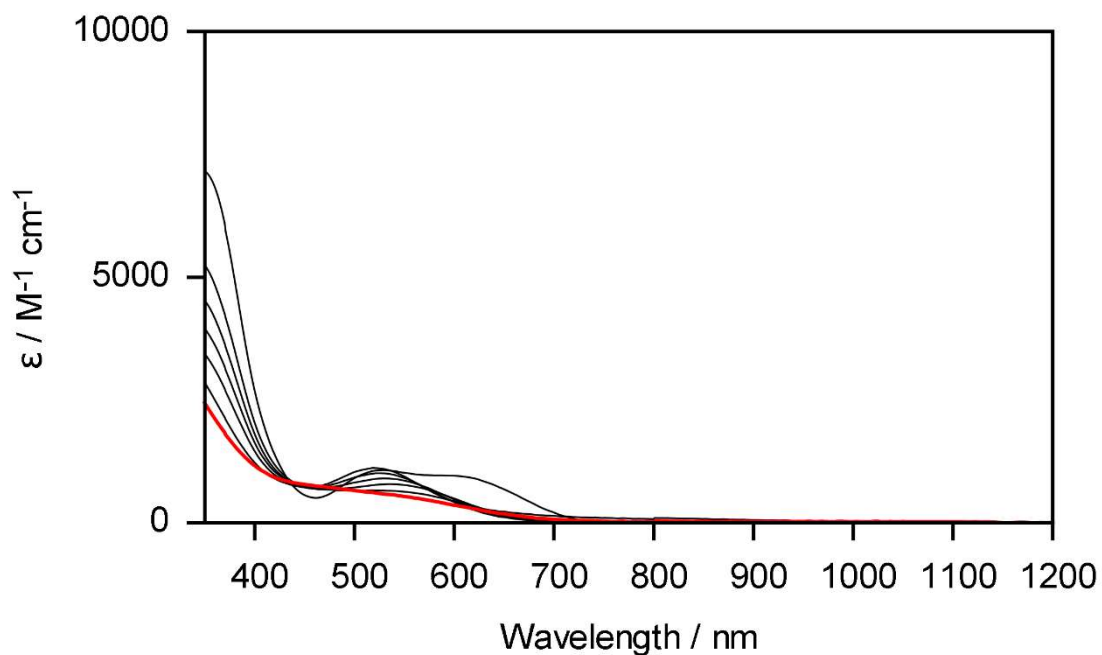

**Figure S39** UV-Vis-NIR spectral changes of **6a** (0.5 mM in CH<sub>2</sub>Cl<sub>2</sub> with 0.05 M <sup>n</sup>Bu<sub>4</sub>NClO<sub>4</sub>) on the application of 0.85 V vs. Ag/Ag<sup>+</sup>. The measurements were performed every 3 minutes. The red line corresponds to the equilibrated state.

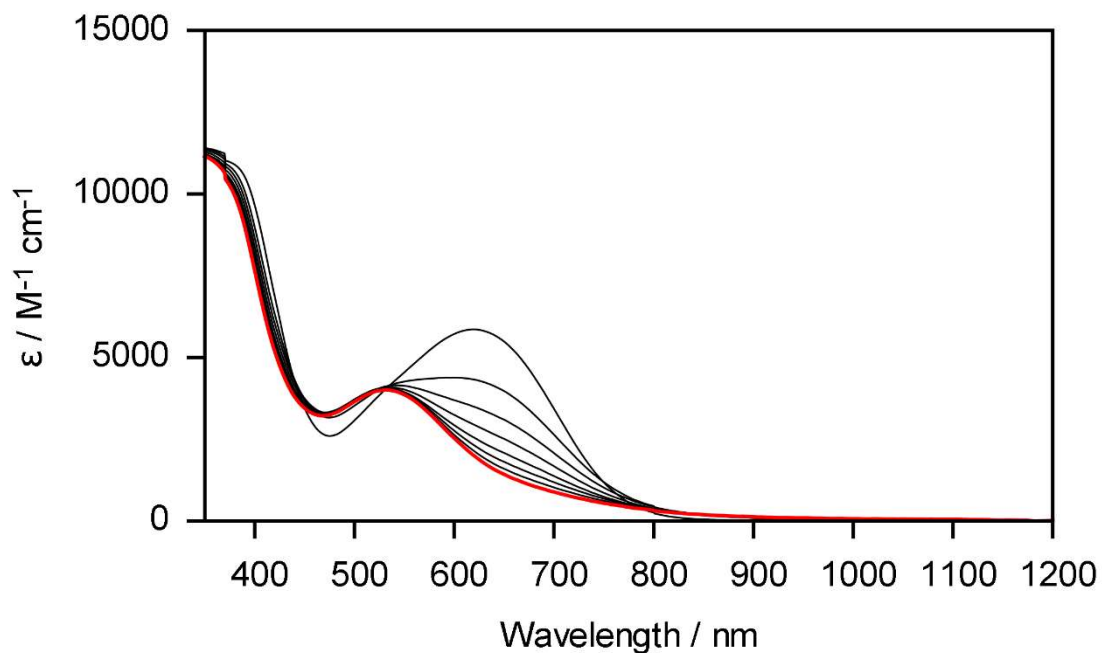

**Figure S40** UV-Vis-NIR spectral changes of **6b** (0.5 mM in CH<sub>2</sub>Cl<sub>2</sub> with 0.05 M <sup>n</sup>Bu<sub>4</sub>NClO<sub>4</sub>) on the application of 0.85 V vs. Ag/Ag<sup>+</sup>. The measurements were performed every 3 minutes. The red line corresponds to the equilibrated state.

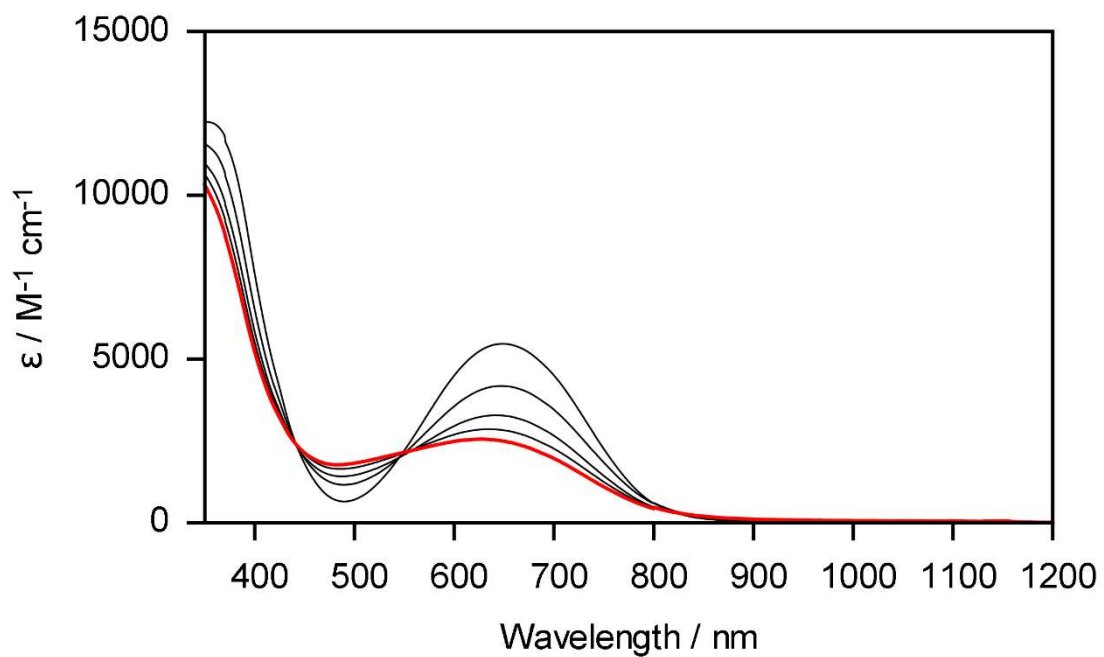

**Figure S41** UV-Vis-NIR spectral changes of **6c** (0.5 mM in  $\text{CH}_2\text{Cl}_2$  with 0.05 M  $n\text{Bu}_4\text{NClO}_4$ ) on the application of 0.85 V vs.  $\text{Ag}/\text{Ag}^+$ . The measurements were performed every 3 minutes. The red line corresponds to the equilibrated state.

### Chemical oxidation

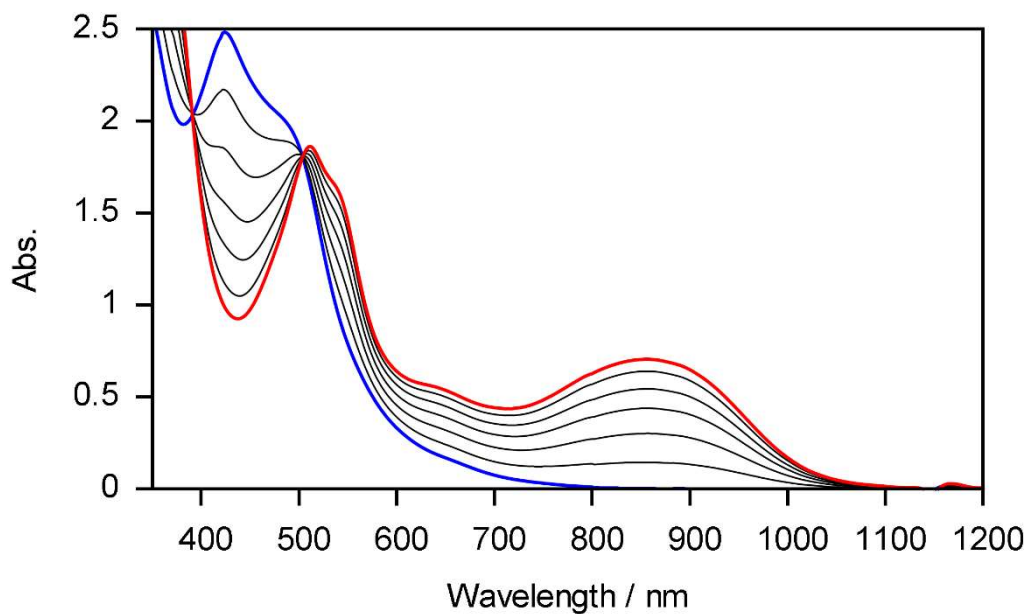

**Figure S42** UV-Vis-NIR spectral changes of **3a** in  $\text{CH}_2\text{Cl}_2$  upon the sequential additions of 0.2 equiv. of CAN in  $\text{CH}_3\text{CN}$  up to 1.2 equiv. The blue and red lines correspond to the initial and equilibrated state.

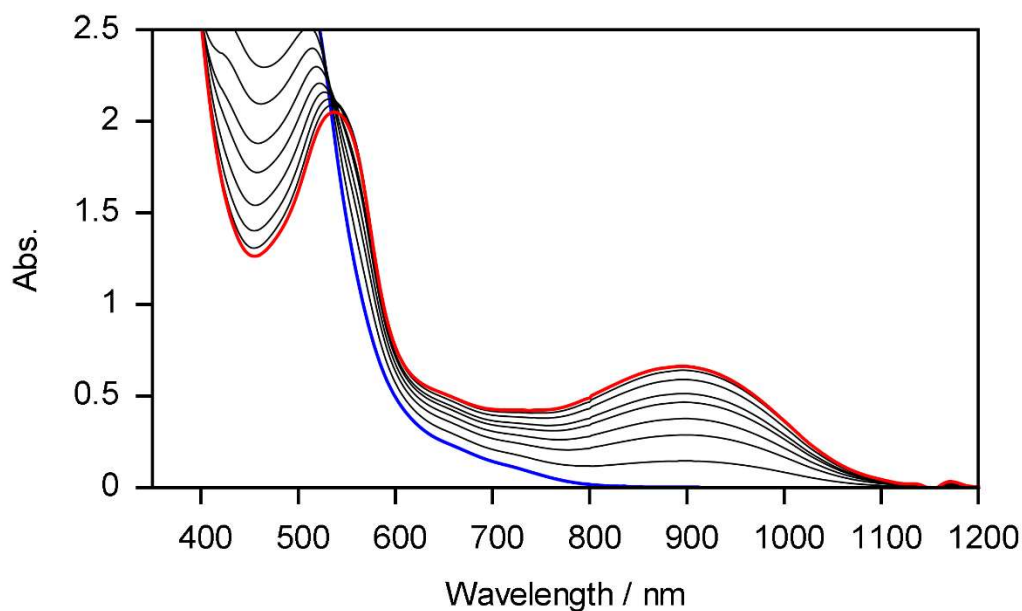

**Figure S43** UV-Vis-NIR spectral changes of **3b** in  $\text{CH}_2\text{Cl}_2$  upon the sequential additions of 0.2 equiv. of CAN in  $\text{CH}_3\text{CN}$  up to 1.6 equiv. The blue and red lines correspond to the initial and equilibrated state.

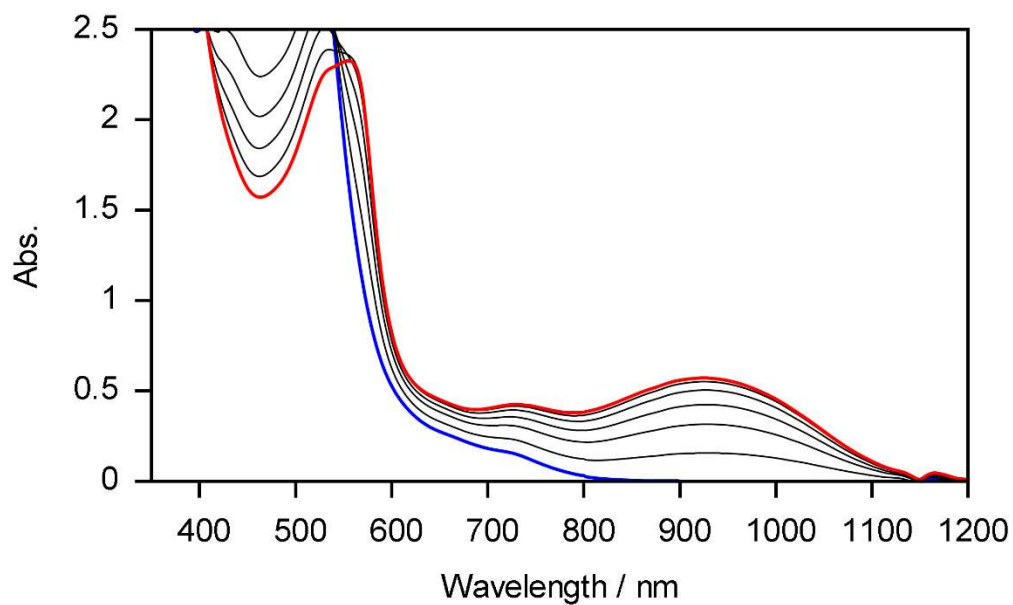

**Figure S44** UV-Vis-NIR spectral changes of **3c** in  $\text{CH}_2\text{Cl}_2$  upon the sequential additions of 0.2 equiv. of CAN in  $\text{CH}_3\text{CN}$  up to 1.0 equiv. The blue and red lines correspond to the initial and equilibrated state.

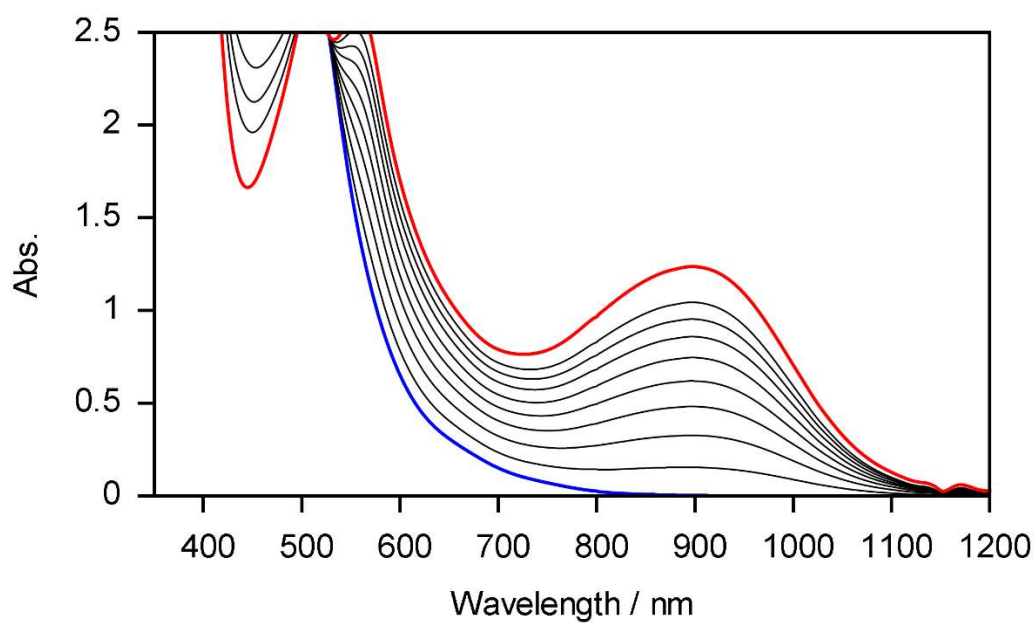

**Figure S45** UV-Vis-NIR spectral changes of **4a** in  $\text{CH}_2\text{Cl}_2$  upon the sequential additions of 0.2 equiv. of CAN in  $\text{CH}_3\text{CN}$  up to 1.8 equiv. The blue and red lines correspond to the initial and equilibrated state.

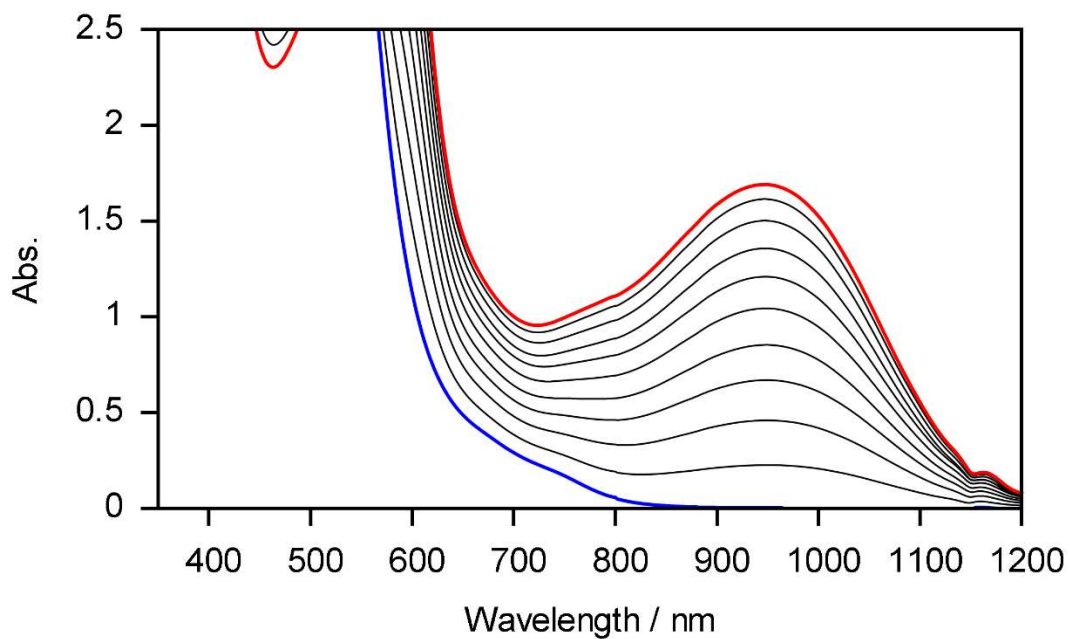

**Figure S46** UV-Vis-NIR spectral changes of **4b** in  $\text{CH}_2\text{Cl}_2$  upon the sequential additions of 0.2 equiv. of CAN in  $\text{CH}_3\text{CN}$  up to 2.0 equiv. The blue and red lines correspond to the initial and equilibrated state.

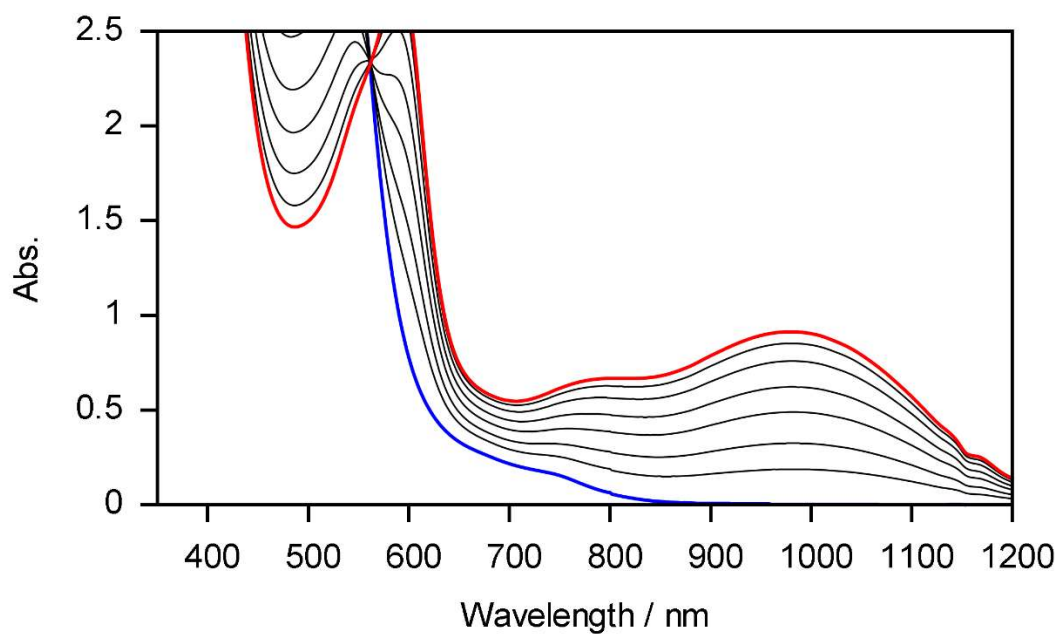

**Figure S47** UV-Vis-NIR spectral changes of **4c** in  $\text{CH}_2\text{Cl}_2$  upon the sequential additions of 0.2 equiv. of CAN in  $\text{CH}_3\text{CN}$  up to 1.4 equiv. The blue and red lines correspond to the initial and equilibrated state.

## DFT calculations

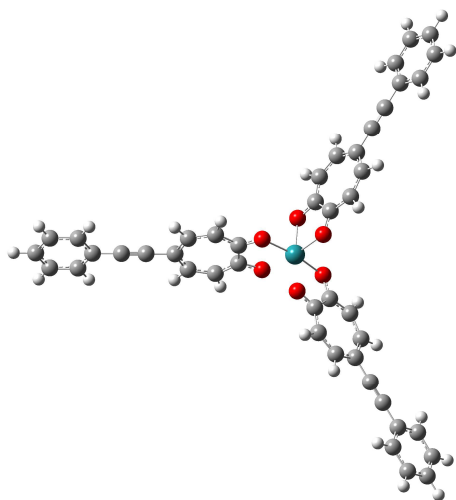

Figure S 48 DFT-optimized structure of **4c**.

Table S3 The atom list of the optimized structure of **4c**.

| Tag | Symbol | Bond     | Angle    | Dihedral | X        | Y        | Z        |
|-----|--------|----------|----------|----------|----------|----------|----------|
| 1   | O      |          |          |          | -1.65842 | -0.73964 | -1.02833 |
| 2   | O      | 2.547009 |          |          | -1.64919 | 0.763262 | 1.027992 |
| 3   | C      | 1.274742 | 65.01235 |          | -2.81187 | -0.42302 | -0.58759 |
| 4   | C      | 1.403762 | 119.2293 | -179.042 | -3.95346 | -0.92489 | -1.23215 |
| 5   | H      | 1.084883 | 112.4246 | 0.809088 | -3.70643 | -1.57015 | -2.06856 |
| 6   | C      | 1.377848 | 131.0021 | -178.806 | -5.29373 | -0.72692 | -0.98128 |
| 7   | H      | 1.085202 | 114.6515 | 179.797  | -5.96278 | -1.24956 | -1.65721 |
| 8   | C      | 1.400102 | 130.7081 | -0.0883  | -5.93583 | 0.038359 | -0.00028 |
| 9   | C      | 1.400149 | 124.972  | -0.22805 | -5.28433 | 0.795492 | 0.980904 |
| 10  | H      | 1.085202 | 114.6396 | 179.8998 | -5.94689 | 1.326361 | 1.656814 |
| 11  | C      | 1.377801 | 130.7079 | -0.21466 | -3.94176 | 0.976709 | 1.231923 |
| 12  | H      | 1.084882 | 116.5742 | -179.69  | -3.68676 | 1.618737 | 2.068428 |
| 13  | C      | 1.274678 | 65.01341 | -1.00724 | -2.8064  | 0.460834 | 0.587302 |
| 14  | Ru     | 2.058243 | 116.79   | -178.569 | -0.03681 | 0.001074 | 0.000309 |
| 15  | O      | 2.015116 | 170.4352 | -31.1427 | 1.352201 | 0.988572 | 1.075575 |
| 16  | C      | 1.291099 | 115.5001 | -61.3059 | 1.696467 | 2.143353 | 0.612004 |
| 17  | C      | 1.394866 | 118.3049 | -177.204 | 2.696936 | 2.851725 | 1.277528 |
| 18  | H      | 1.085027 | 112.3652 | 0.352931 | 3.081042 | 2.313798 | 2.137981 |



|    |   |          |          |          |          |          |          |
|----|---|----------|----------|----------|----------|----------|----------|
| 19 | C | 1.38444  | 131.2641 | -179.674 | 3.260929 | 4.090563 | 1.024808 |
| 20 | H | 1.084917 | 114.7033 | -179.745 | 4.036848 | 4.38644  | 1.722986 |
| 21 | C | 1.393322 | 130.4071 | 0.335723 | 2.99144  | 5.017632 | 0.020187 |
| 22 | O | 2.068554 | 96.32122 | -87.6631 | 0.090325 | 1.789136 | -1.03197 |
| 23 | C | 1.270485 | 114.1766 | 175.0997 | 0.968914 | 2.588686 | -0.58149 |
| 24 | C | 1.411974 | 118.5621 | 177.9349 | 1.164897 | 3.819701 | -1.24471 |
| 25 | H | 1.084991 | 112.039  | -0.07774 | 0.50648  | 3.930754 | -2.0999  |
| 26 | C | 1.371412 | 131.2495 | -179.733 | 2.027633 | 4.855451 | -0.99236 |
| 27 | H | 1.085048 | 114.8593 | 179.665  | 1.957154 | 5.687062 | -1.68575 |
| 28 | O | 2.068432 | 88.69276 | 96.28424 | 0.066091 | -1.78853 | 1.032359 |
| 29 | O | 2.015169 | 95.30739 | 174.5968 | 1.340351 | -1.00403 | -1.07398 |
| 30 | C | 1.27053  | 114.173  | 98.86568 | 0.933999 | -2.59974 | 0.581892 |
| 31 | C | 1.411946 | 118.5588 | 177.9656 | 1.112842 | -3.8336  | 1.244617 |
| 32 | H | 1.084996 | 112.038  | -0.0829  | 0.452568 | -3.93603 | 2.099464 |
| 33 | C | 1.371431 | 131.252  | -179.743 | 1.9614   | -4.881   | 0.992173 |
| 34 | H | 1.085047 | 114.8593 | 179.67   | 1.879173 | -5.71189 | 1.685124 |
| 35 | C | 1.407267 | 130.5607 | -0.33326 | 2.923338 | -5.0559  | -0.02    |
| 36 | C | 1.393358 | 125.0688 | -0.22016 | 3.205955 | -4.13213 | -1.0241  |
| 37 | H | 1.084915 | 114.8897 | -179.803 | 3.978013 | -4.43832 | -1.72211 |
| 38 | C | 1.384407 | 130.4056 | 0.116696 | 2.659136 | -2.88558 | -1.27643 |
| 39 | H | 1.08503  | 116.3719 | -179.694 | 3.050941 | -2.35253 | -2.13645 |
| 40 | C | 1.291084 | 115.4922 | -91.0371 | 1.668253 | -2.16376 | -0.61092 |
| 41 | C | 1.427559 | 117.5157 | 179.7743 | -7.36336 | 0.047357 | -0.00037 |
| 42 | C | 1.42699  | 117.2318 | 179.9168 | 3.661991 | -6.27683 | -0.01489 |
| 43 | C | 1.426999 | 117.6999 | 179.976  | 3.746757 | 6.228332 | 0.014838 |
| 44 | C | 1.203498 | 179.9935 | -161.647 | -8.56683 | 0.055056 | -0.00038 |
| 45 | C | 1.203407 | 179.8333 | -3.5262  | 4.283302 | -7.30742 | -0.00763 |
| 46 | C | 1.203407 | 179.8348 | 177.29   | 4.382115 | 7.250317 | 0.007415 |
| 47 | C | 1.426204 | 179.9971 | -59.1379 | -9.99301 | 0.064176 | -0.00031 |
| 48 | C | 1.398759 | 120.5367 | 40.21951 | -10.699  | 0.797819 | 0.958796 |
| 49 | C | 1.39877  | 120.5373 | -139.78  | -10.7084 | -0.66039 | -0.95935 |
| 50 | C | 1.384639 | 120.3832 | -180     | -12.0836 | 0.804426 | 0.955908 |
| 51 | H | 1.083551 | 119.2436 | -0.00555 | -10.15   | 1.360891 | 1.704191 |
| 52 | C | 1.384628 | 120.383  | 179.998  | -12.093  | -0.64931 | -0.9563  |
| 53 | H | 1.083551 | 119.2429 | -0.00744 | -10.1667 | -1.23042 | -1.70481 |

|    |   |          |          |          |          |          |          |
|----|---|----------|----------|----------|----------|----------|----------|
| 54 | C | 1.38861  | 120.2806 | 0.00182  | -12.7852 | 0.082008 | -0.00015 |
| 55 | H | 1.084291 | 119.6479 | 179.9981 | -12.6188 | 1.377262 | 1.704978 |
| 56 | H | 1.084291 | 119.6485 | 179.9984 | -12.6356 | -1.21526 | -1.7053  |
| 57 | H | 1.084181 | 120.1271 | 179.999  | -13.8694 | 0.088925 | -8.7E-05 |
| 58 | C | 1.426111 | 179.9388 | 169.2541 | 5.020076 | -8.52844 | -0.00043 |
| 59 | C | 1.398674 | 120.4915 | 14.17659 | 5.991982 | -8.77664 | -0.97516 |
| 60 | C | 1.398668 | 120.4988 | -165.817 | 4.781514 | -9.49569 | 0.981295 |
| 61 | C | 1.38455  | 120.338  | -179.992 | 6.705306 | -9.96325 | -0.96526 |
| 62 | H | 1.083517 | 119.2749 | 0.000743 | 6.180237 | -8.03032 | -1.73777 |
| 63 | C | 1.384547 | 120.3378 | 179.9918 | 5.498647 | -10.68   | 0.985021 |
| 64 | H | 1.08352  | 119.2786 | -0.00427 | 4.029555 | -9.30796 | 1.738481 |
| 65 | C | 1.388644 | 120.2565 | 0        | 6.46172  | -10.9179 | 0.013304 |
| 66 | H | 1.084205 | 119.6653 | 179.995  | 7.456163 | -10.1443 | -1.72613 |
| 67 | H | 1.084204 | 119.6648 | -179.997 | 5.304781 | -11.4223 | 1.751135 |
| 68 | H | 1.084147 | 120.0999 | 179.9963 | 7.021724 | -11.8462 | 0.018616 |
| 69 | C | 1.426115 | 179.9383 | 170.788  | 5.135585 | 8.461115 | 2.36E-05 |
| 70 | C | 1.398674 | 120.4922 | 11.90753 | 6.109716 | 8.696804 | 0.97563  |
| 71 | C | 1.398667 | 120.4987 | -168.084 | 4.91139  | 9.430712 | -0.98277 |
| 72 | C | 1.38455  | 120.3381 | -179.989 | 6.839219 | 9.873538 | 0.965557 |
| 73 | H | 1.083517 | 119.275  | 0.002454 | 6.286889 | 7.948627 | 1.739076 |
| 74 | C | 1.384548 | 120.3382 | 179.9889 | 5.644665 | 10.60513 | -0.98666 |
| 75 | H | 1.083521 | 119.2782 | -0.00665 | 4.15778  | 9.25265  | -1.74065 |
| 76 | C | 1.388642 | 120.257  | -0.00043 | 6.609815 | 10.83065 | -0.01406 |
| 77 | H | 1.084206 | 119.6652 | 179.9948 | 7.591638 | 10.04498 | 1.727118 |
| 78 | H | 1.084204 | 119.6647 | -179.996 | 5.461826 | 11.34936 | -1.75361 |
| 79 | H | 1.084147 | 120.1002 | 179.9964 | 7.182475 | 11.75119 | -0.0195  |

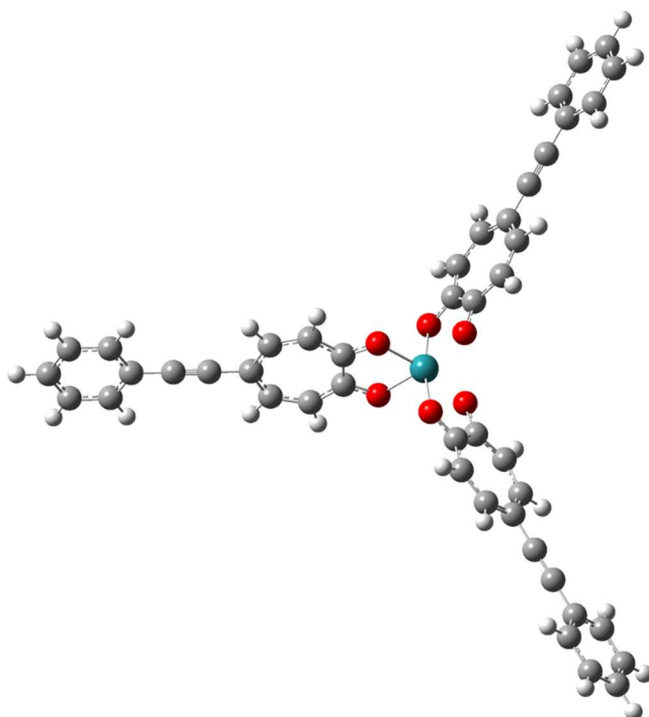

**Figure S49** DFT-optimized structure of  $4c^+$ .

**Table S4** The atom list of the optimized structure of  $4c^+$ .

| Tag | Symbol | Bond     | Angle    | Dihedral | X        | Y        | Z        |
|-----|--------|----------|----------|----------|----------|----------|----------|
| 1   | O      |          |          |          | 1.569594 | -0.65103 | -1.06238 |
| 2   | O      | 2.52833  |          |          | 0.578751 | -1.59958 | 1.061516 |
| 3   | C      | 1.29401  | 65.20613 |          | 2.170164 | -1.70234 | -0.60575 |
| 4   | C      | 1.400341 | 118.5246 | 179.9443 | 3.274708 | -2.19962 | -1.30835 |
| 5   | H      | 1.084834 | 112.9066 | -0.01973 | 3.508093 | -1.61861 | -2.19425 |
| 6   | C      | 1.376529 | 130.3277 | -179.901 | 4.080721 | -3.28485 | -1.04864 |
| 7   | H      | 1.084218 | 115.0214 | -179.987 | 4.877528 | -3.44639 | -1.76595 |
| 8   | C      | 1.404691 | 130.2612 | 0.056871 | 4.035387 | -4.21925 | -0.00078 |
| 9   | C      | 1.404651 | 125.4603 | -0.00661 | 3.100005 | -4.22376 | 1.047116 |
| 10  | H      | 1.084218 | 114.7184 | -179.964 | 3.226571 | -5.02693 | 1.764357 |
| 11  | C      | 1.376564 | 130.2605 | -0.00963 | 2.051079 | -3.37103 | 1.306984 |
| 12  | H      | 1.084835 | 116.7651 | -179.821 | 1.460472 | -3.57887 | 2.192905 |
| 13  | C      | 1.294072 | 65.20528 | -0.15854 | 1.602724 | -2.24563 | 0.604656 |
| 14  | Ru     | 2.004523 | 50.90746 | 179.8887 | -0.00107 | -0.00091 | 0.000299 |
| 15  | O      | 2.004616 | 94.52132 | 172.302  | -1.67471 | 0.295684 | 1.063049 |

|    |   |          |          |          |          |          |          |
|----|---|----------|----------|----------|----------|----------|----------|
| 16 | C | 1.294051 | 116.1066 | -92.8812 | -2.74665 | -0.26712 | 0.606118 |
| 17 | C | 1.400322 | 118.5233 | -179.982 | -3.94512 | -0.09267 | 1.309068 |
| 18 | H | 1.084837 | 112.9067 | -0.02738 | -3.8291  | 0.521838 | 2.195516 |
| 19 | C | 1.376539 | 130.3274 | -179.91  | -5.20846 | -0.57355 | 1.049106 |
| 20 | H | 1.084217 | 115.0216 | -179.986 | -5.96691 | -0.28167 | 1.766797 |
| 21 | C | 1.404682 | 130.2613 | 0.057131 | -5.67314 | -1.38459 | 0.000573 |
| 22 | O | 2.004563 | 93.6495  | 93.8736  | -1.3501  | -1.03533 | -1.06195 |
| 23 | C | 1.294073 | 116.1077 | 93.79868 | -2.56078 | -1.02929 | -0.60495 |
| 24 | C | 1.400303 | 118.5226 | 179.9986 | -3.54433 | -1.736   | -1.30782 |
| 25 | H | 1.084837 | 112.9068 | -0.02498 | -3.15842 | -2.22814 | -2.19424 |
| 26 | C | 1.376548 | 130.3278 | -179.902 | -4.88723 | -1.89071 | -1.04789 |
| 27 | H | 1.084217 | 115.0215 | -179.994 | -5.42614 | -2.499   | -1.76559 |
| 28 | O | 2.004682 | 94.53456 | -92.7468 | 1.094448 | 1.299789 | 1.061795 |
| 29 | O | 2.004557 | 169.4777 | -46.9812 | -0.22382 | 1.685138 | -1.06078 |
| 30 | C | 1.293992 | 116.1132 | 172.2246 | 1.142509 | 2.509639 | 0.605322 |
| 31 | C | 1.400345 | 118.5263 | -179.974 | 1.894179 | 3.45993  | 1.307395 |
| 32 | H | 1.084834 | 112.9069 | -0.02312 | 2.36982  | 3.051764 | 2.192849 |
| 33 | C | 1.376522 | 130.3273 | -179.902 | 2.10909  | 4.794533 | 1.047667 |
| 34 | H | 1.084217 | 115.0211 | -179.989 | 2.742384 | 5.305034 | 1.764503 |
| 35 | C | 1.4047   | 130.2613 | 0.056267 | 1.6373   | 5.603015 | 0.000311 |
| 36 | C | 1.404652 | 125.4599 | -0.00509 | 0.804171 | 5.176051 | -1.0469  |
| 37 | H | 1.084218 | 114.7186 | -179.967 | 0.545656 | 5.947255 | -1.76379 |
| 38 | C | 1.376563 | 130.2608 | -0.01134 | 0.266075 | 3.935886 | -1.30645 |
| 39 | H | 1.084834 | 116.7647 | -179.822 | -0.35465 | 3.848252 | -2.19183 |
| 40 | C | 1.294058 | 116.1183 | -46.9285 | 0.387499 | 2.730409 | -0.60439 |
| 41 | C | 1.419122 | 117.2688 | 179.9978 | 5.016747 | -5.24435 | -0.00082 |
| 42 | C | 1.419114 | 117.2702 | 179.9935 | 2.035665 | 6.965068 | 0.000202 |
| 43 | C | 1.419118 | 117.2698 | 179.9991 | -7.05189 | -1.72067 | 0.000483 |
| 44 | C | 1.204807 | 179.9913 | 147.2361 | 5.849902 | -6.11465 | -0.00067 |
| 45 | C | 1.204808 | 179.9992 | 53.18839 | 2.373889 | 8.121427 | 0.00011  |
| 46 | C | 1.204814 | 179.9934 | 72.2662  | -8.22246 | -2.00587 | 0.00037  |
| 47 | C | 1.422854 | 179.9933 | -39.1521 | 6.833918 | -7.14238 | -0.00037 |
| 48 | C | 1.399309 | 120.2783 | 71.5489  | 6.851801 | -8.10174 | 1.018143 |
| 49 | C | 1.399307 | 120.2779 | -108.446 | 7.791963 | -7.20215 | -1.01853 |
| 50 | C | 1.383581 | 120.084  | -179.991 | 7.810593 | -9.09923 | 1.01459  |

|    |   |          |          |          |          |          |          |
|----|---|----------|----------|----------|----------|----------|----------|
| 51 | H | 1.083387 | 119.5002 | -0.00047 | 6.11054  | -8.05627 | 1.806935 |
| 52 | C | 1.383584 | 120.0843 | 179.9968 | 8.747036 | -8.20321 | -1.01425 |
| 53 | H | 1.083388 | 119.5003 | -0.0116  | 7.778903 | -6.45991 | -1.8076  |
| 54 | C | 1.389133 | 120.1347 | -0.00613 | 8.758351 | -9.15197 | 0.000352 |
| 55 | H | 1.083659 | 119.7739 | 179.9932 | 7.819854 | -9.83955 | 1.805892 |
| 56 | H | 1.083659 | 119.7739 | 179.9938 | 9.486543 | -8.2448  | -1.80528 |
| 57 | H | 1.083848 | 119.9409 | -179.996 | 9.507985 | -9.93477 | 0.00064  |
| 58 | C | 1.42285  | 179.9934 | 51.66433 | 2.773429 | 9.48703  | -0.00012 |
| 59 | C | 1.399313 | 120.2784 | 74.7116  | 2.347471 | 10.3466  | -1.01884 |
| 60 | C | 1.399308 | 120.2782 | -105.288 | 3.59563  | 9.981754 | 1.018357 |
| 61 | C | 1.38358  | 120.0843 | -179.995 | 2.738489 | 11.67377 | -1.01517 |
| 62 | H | 1.083389 | 119.4999 | -0.00587 | 1.710966 | 9.964505 | -1.80789 |
| 63 | C | 1.383581 | 120.0843 | -179.998 | 3.981681 | 11.31038 | 1.014215 |
| 64 | H | 1.083388 | 119.5002 | -0.00675 | 3.92588  | 9.317085 | 1.807585 |
| 65 | C | 1.389134 | 120.135  | -0.00746 | 3.554787 | 12.1575  | -0.00059 |
| 66 | H | 1.08366  | 119.7737 | 179.9922 | 2.405771 | 12.33497 | -1.80664 |
| 67 | H | 1.08366  | 119.7738 | 179.9933 | 4.618421 | 11.68821 | 1.805494 |
| 68 | H | 1.083848 | 119.941  | -179.996 | 3.859156 | 13.19774 | -0.00078 |
| 69 | C | 1.422862 | 179.9871 | 41.39584 | -9.60492 | -2.34251 | -3.1E-05 |
| 70 | C | 1.399316 | 120.2792 | -114.021 | -10.4445 | -1.8782  | 1.018638 |
| 71 | C | 1.399306 | 120.2784 | 65.97356 | -10.1364 | -3.14058 | -1.01916 |
| 72 | C | 1.383577 | 120.0849 | 179.9945 | -11.7882 | -2.2079  | 1.01423  |
| 73 | H | 1.083385 | 119.4994 | -0.01221 | -10.0339 | -1.26034 | 1.808198 |
| 74 | C | 1.383582 | 120.085  | -179.988 | -11.4814 | -3.46529 | -1.01575 |
| 75 | H | 1.083388 | 119.4995 | 0        | -9.48731 | -3.50049 | -1.80835 |
| 76 | C | 1.389133 | 120.135  | -0.00692 | -12.3084 | -3.00056 | -0.00101 |
| 77 | H | 1.083659 | 119.7742 | 179.9951 | -12.4337 | -1.84565 | 1.805641 |
| 78 | H | 1.08366  | 119.774  | 179.9924 | -11.8877 | -4.08358 | -1.80754 |
| 79 | H | 1.083848 | 119.941  | -179.997 | -13.3615 | -3.25688 | -0.00141 |

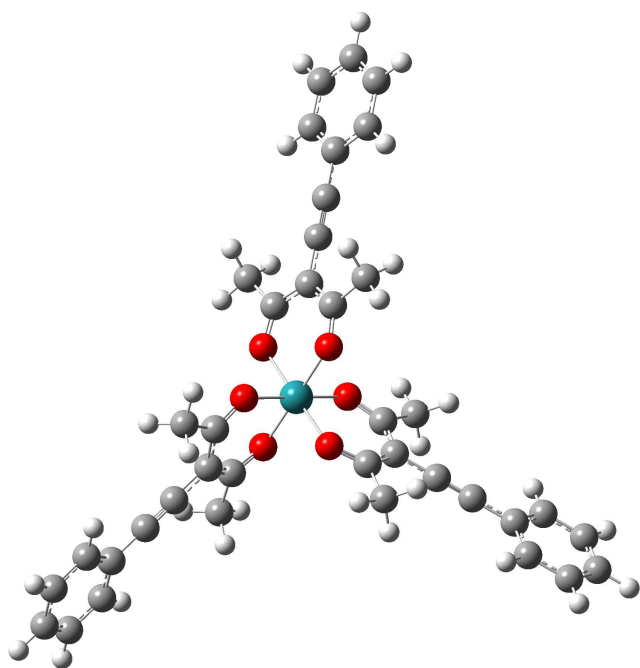

**Figure S50** DFT-optimized structure of **6c**.

**Table S5** The atom list of the optimized structure of **6c**.

| Tag | Symbol | Bond     | Angle    | Dihedral | X        | Y        | Z        |
|-----|--------|----------|----------|----------|----------|----------|----------|
| 1   | Ru     |          |          |          | -3.3E-06 | -0.46227 | 8.79E-05 |
| 2   | O      | 2.026827 |          |          | 0.99222  | 0.960234 | 1.048897 |
| 3   | C      | 1.26352  | 126.0882 |          | 0.860071 | 2.209909 | 0.917243 |
| 4   | C      | 1.418881 | 126.0897 | -0.63818 | -5.1E-05 | 2.867388 | 0.000109 |
| 5   | C      | 1.418882 | 124.7888 | 0.356196 | -0.86018 | 2.209895 | -0.91701 |
| 6   | O      | 1.263518 | 126.0897 | 0.35355  | -0.99232 | 0.960221 | -1.04866 |
| 7   | C      | 1.503084 | 119.1057 | -179.766 | -1.71578 | 3.034858 | -1.83714 |
| 8   | H      | 1.091462 | 110.5768 | 59.32621 | -1.09548 | 3.677962 | -2.46399 |
| 9   | H      | 1.091447 | 110.6711 | -58.9232 | -2.37549 | 3.690121 | -1.2656  |
| 10  | H      | 1.08734  | 109.0968 | -179.87  | -2.30726 | 2.371211 | -2.46327 |
| 11  | C      | 1.425875 | 117.6057 | -179.644 | -3.8E-05 | 4.293262 | 0.000083 |
| 12  | C      | 1.204268 | 179.9986 | 127.9282 | -2.3E-05 | 5.49753  | 3.26E-05 |
| 13  | C      | 1.503084 | 114.8044 | 179.4789 | 1.715664 | 3.034883 | 1.837373 |
| 14  | H      | 1.08734  | 109.0967 | 0.016008 | 2.307061 | 2.371243 | 2.463584 |
| 15  | H      | 1.091461 | 110.5773 | -120.788 | 1.095378 | 3.678085 | 2.464129 |
| 16  | H      | 1.091448 | 110.6706 | 120.9622 | 2.375461 | 3.69005  | 1.26581  |
| 17  | O      | 2.018084 | 91.16713 | -89.0217 | -1.49708 | -0.47435 | 1.353338 |

|    |   |          |          |          |          |          |          |
|----|---|----------|----------|----------|----------|----------|----------|
| 18 | C | 1.269973 | 126.9236 | 162.1577 | -2.66905 | -0.93564 | 1.190451 |
| 19 | C | 1.502332 | 114.6916 | -169.961 | -3.63605 | -0.59429 | 2.288346 |
| 20 | H | 1.087401 | 109.2027 | -0.68709 | -3.12401 | -0.0055  | 3.045697 |
| 21 | H | 1.091235 | 110.8372 | -121.843 | -4.04785 | -1.49921 | 2.738157 |
| 22 | H | 1.091823 | 110.3333 | 119.9579 | -4.47892 | -0.0269  | 1.888697 |
| 23 | C | 1.409198 | 125.7811 | 11.31736 | -3.098   | -1.73288 | 0.110518 |
| 24 | C | 1.424558 | 118.2114 | -179.643 | -4.45753 | -2.15764 | 0.085346 |
| 25 | C | 1.204439 | 179.7651 | 91.73572 | -5.60817 | -2.51277 | 0.06142  |
| 26 | C | 1.42586  | 123.6044 | 4.487416 | -2.22763 | -2.2085  | -0.91384 |
| 27 | O | 1.254601 | 125.3663 | -5.39418 | -1.01636 | -1.90536 | -1.0362  |
| 28 | C | 1.502366 | 119.0885 | 173.1731 | -2.75871 | -3.17726 | -1.93195 |
| 29 | H | 1.09189  | 110.1019 | 62.35822 | -3.56378 | -2.71436 | -2.50623 |
| 30 | H | 1.091102 | 110.9146 | -55.7621 | -3.18101 | -4.05897 | -1.44744 |
| 31 | H | 1.087373 | 109.1918 | -177.254 | -1.95347 | -3.46891 | -2.60196 |
| 32 | O | 2.018075 | 179.3192 | -63.2927 | 1.497073 | -0.47417 | -1.35315 |
| 33 | C | 1.269977 | 126.9234 | -63.2381 | 2.669081 | -0.93538 | -1.19027 |
| 34 | C | 1.409193 | 125.7811 | 11.32526 | 3.098052 | -1.73275 | -0.11045 |
| 35 | C | 1.425867 | 123.6044 | 4.480652 | 2.227688 | -2.20851 | 0.913863 |
| 36 | O | 1.254596 | 125.3664 | -5.3968  | 1.016438 | -1.90537 | 1.036295 |
| 37 | C | 1.502367 | 119.0882 | 173.1711 | 2.758782 | -3.17744 | 1.931812 |
| 38 | H | 1.087373 | 109.1917 | -177.263 | 1.953589 | -3.46905 | 2.601891 |
| 39 | H | 1.091889 | 110.1029 | 62.34793 | 3.564002 | -2.71471 | 2.506029 |
| 40 | H | 1.091104 | 110.9134 | -55.7725 | 3.180893 | -4.05916 | 1.447143 |
| 41 | C | 1.424554 | 118.2116 | -179.652 | 4.457569 | -2.15753 | -0.08536 |
| 42 | C | 1.204439 | 179.7641 | 91.79405 | 5.608214 | -2.51266 | -0.06149 |
| 43 | C | 1.502334 | 114.6916 | -169.957 | 3.636093 | -0.59383 | -2.2881  |
| 44 | H | 1.091241 | 110.8341 | -121.796 | 4.04734  | -1.49871 | -2.7385  |
| 45 | H | 1.091816 | 110.3361 | 120.0037 | 4.479314 | -0.02709 | -1.88828 |
| 46 | H | 1.087401 | 109.2027 | -0.64613 | 3.1242   | -0.00439 | -3.04506 |
| 47 | C | 1.427166 | 179.9996 | 68.96098 | -1.3E-05 | 6.924696 | -3.2E-05 |
| 48 | C | 1.398847 | 120.626  | -16.5273 | -0.82898 | 7.63728  | -0.87285 |
| 49 | C | 1.398848 | 120.626  | 163.4731 | 0.828969 | 7.637347 | 0.872717 |
| 50 | C | 1.384842 | 120.4775 | -179.997 | -0.82645 | 9.022117 | -0.87036 |
| 51 | H | 1.083725 | 119.2651 | 0.001174 | -1.47463 | 7.093608 | -1.55257 |
| 52 | C | 1.384842 | 120.4775 | -179.998 | 0.826471 | 9.022184 | 0.870088 |

|    |   |          |          |          |          |          |          |
|----|---|----------|----------|----------|----------|----------|----------|
| 53 | H | 1.083725 | 119.2651 | 0.000643 | 1.474608 | 7.093728 | 1.552487 |
| 54 | C | 1.388474 | 120.3393 | -0.00554 | 1.62E-05 | 9.720388 | -0.00017 |
| 55 | H | 1.084412 | 119.603  | 179.9975 | -1.47478 | 9.560218 | -1.55304 |
| 56 | H | 1.084412 | 119.603  | 179.9975 | 1.474816 | 9.560338 | 1.552721 |
| 57 | H | 1.084151 | 120.1908 | -179.997 | 2.73E-05 | 10.80454 | -0.00022 |
| 58 | C | 1.426997 | 179.9359 | 35.04411 | 6.971628 | -2.93282 | -0.03173 |
| 59 | C | 1.398928 | 120.6303 | 54.3024  | 7.445467 | -3.74244 | 1.006054 |
| 60 | C | 1.39892  | 120.6435 | -125.704 | 7.85997  | -2.54321 | -1.03971 |
| 61 | C | 1.384842 | 120.4877 | -179.995 | 9.182428 | -2.95293 | -1.00769 |
| 62 | C | 1.38484  | 120.4886 | 179.9793 | 8.769083 | -4.14884 | 1.031794 |
| 63 | C | 1.388477 | 120.3457 | 0.017538 | 9.642963 | -3.75669 | 0.026598 |
| 64 | H | 1.083726 | 119.2535 | 0.002593 | 7.50197  | -1.91609 | -1.8478  |
| 65 | H | 1.084435 | 119.5984 | -179.997 | 9.858636 | -2.64235 | -1.79654 |
| 66 | H | 1.083727 | 119.254  | -0.03038 | 6.764734 | -4.049   | 1.791603 |
| 67 | H | 1.084433 | 119.5986 | -179.994 | 9.121004 | -4.77646 | 1.843115 |
| 68 | H | 1.08416  | 120.1974 | 179.9915 | 10.67875 | -4.07613 | 0.049208 |
| 69 | C | 1.427003 | 179.9339 | 33.66718 | -6.97161 | -2.93287 | 0.031569 |
| 70 | C | 1.398918 | 120.6431 | -124.256 | -7.86002 | -2.54311 | 1.039427 |
| 71 | C | 1.398927 | 120.6303 | 55.75067 | -7.44538 | -3.74256 | -1.00619 |
| 72 | C | 1.384844 | 120.4875 | -179.995 | -9.1825  | -2.95276 | 1.007316 |
| 73 | H | 1.083725 | 119.2536 | 0.002021 | -7.50206 | -1.91593 | 1.847497 |
| 74 | C | 1.38484  | 120.4884 | 179.9798 | -8.76902 | -4.14888 | -1.03202 |
| 75 | H | 1.083726 | 119.254  | -0.0296  | -6.76458 | -4.04924 | -1.79163 |
| 76 | C | 1.388477 | 120.3456 | 0.017321 | -9.64298 | -3.75659 | -0.02695 |
| 77 | H | 1.084435 | 119.5985 | -179.997 | -9.85877 | -2.64208 | 1.796072 |
| 78 | H | 1.084433 | 119.5987 | -179.994 | -9.1209  | -4.77656 | -1.84331 |
| 79 | H | 1.08416  | 120.1973 | 179.9915 | -10.6788 | -4.07598 | -0.04963 |



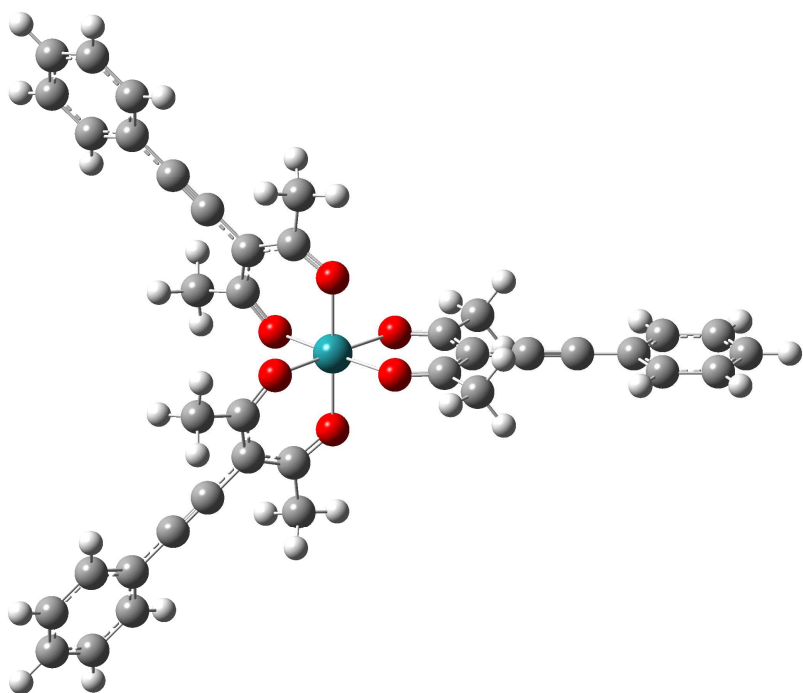

**Figure S51** DFT-optimized structure of **6c<sup>+</sup>**.

**Table S6** The atom list of the optimized structure of **6c<sup>+</sup>**.

| Tag | Symbol | Bond     | Angle    | Dihedral | X        | Y        | Z        |
|-----|--------|----------|----------|----------|----------|----------|----------|
| 1   | Ru     |          |          |          | 0.457072 | -0.00013 | 4.13E-05 |
| 2   | O      | 2.014349 |          |          | 0.456858 | 1.872624 | 0.741935 |
| 3   | C      | 1.269216 | 125.4596 |          | -0.50696 | 2.694872 | 0.665254 |
| 4   | C      | 1.417019 | 124.9576 | -13.6702 | -1.63435 | 2.547755 | -0.18048 |
| 5   | C      | 1.413518 | 123.6509 | -6.3434  | -1.76212 | 1.521425 | -1.144   |
| 6   | O      | 1.27318  | 125.3438 | 7.579976 | -0.96639 | 0.537106 | -1.28152 |
| 7   | C      | 1.497885 | 119.8324 | -170.831 | -2.88815 | 1.561899 | -2.13096 |
| 8   | H      | 1.091035 | 110.8143 | 55.5254  | -2.88679 | 2.503382 | -2.68229 |
| 9   | H      | 1.091973 | 110.0637 | -62.3065 | -3.84575 | 1.504276 | -1.60934 |
| 10  | H      | 1.087155 | 109.559  | 177.0947 | -2.79756 | 0.726648 | -2.82092 |
| 11  | C      | 1.425151 | 118.0833 | 179.4588 | -2.63944 | 3.55733  | -0.14036 |
| 12  | C      | 1.203701 | 179.6591 | -93.8237 | -3.49199 | 4.406188 | -0.10164 |
| 13  | C      | 1.497956 | 115.4491 | 168.1524 | -0.38045 | 3.916695 | 1.522585 |
| 14  | H      | 1.087285 | 109.58   | 1.904531 | 0.568337 | 3.892948 | 2.053076 |
| 15  | H      | 1.092093 | 109.9017 | -118.377 | -1.1994  | 3.95087  | 2.244264 |
| 16  | H      | 1.090945 | 111.0115 | 123.7903 | -0.45277 | 4.824858 | 0.922443 |

|    |   |          |          |          |          |          |          |
|----|---|----------|----------|----------|----------|----------|----------|
| 17 | O | 1.989282 | 88.6237  | 68.71999 | -0.96632 | -0.53744 | 1.281634 |
| 18 | C | 1.273177 | 125.9044 | 68.71582 | -1.76205 | -1.52176 | 1.144103 |
| 19 | C | 1.497884 | 114.8066 | -169.812 | -2.888   | -1.56232 | 2.131142 |
| 20 | H | 1.087156 | 109.5585 | -1.5317  | -2.79683 | -0.72766 | 2.821754 |
| 21 | H | 1.091026 | 110.8186 | -123.108 | -2.88731 | -2.50425 | 2.68168  |
| 22 | H | 1.091982 | 110.0593 | 119.0583 | -3.84558 | -1.50353 | 1.609599 |
| 23 | C | 1.413525 | 125.3435 | 11.70444 | -1.63437 | -2.54799 | 0.180467 |
| 24 | C | 1.42514  | 118.0212 | -178.212 | -2.63951 | -3.55749 | 0.14025  |
| 25 | C | 1.203703 | 179.659  | 91.36925 | -3.49213 | -4.40628 | 0.10148  |
| 26 | C | 1.417019 | 123.65   | 7.587436 | -0.50698 | -2.69507 | -0.6653  |
| 27 | O | 1.269215 | 124.9574 | -6.34345 | 0.456877 | -1.87287 | -0.74188 |
| 28 | C | 1.497958 | 119.5686 | 171.7628 | -0.38054 | -3.91682 | -1.52275 |
| 29 | H | 1.092089 | 109.9034 | 63.31121 | -1.19977 | -3.95119 | -2.24409 |
| 30 | H | 1.09095  | 111.0089 | -54.5224 | -0.45237 | -4.82501 | -0.92258 |
| 31 | H | 1.087285 | 109.5799 | -176.403 | 0.568051 | -3.89283 | -2.05359 |
| 32 | O | 2.090914 | 178.0777 | -90.2691 | 1.998084 | 0.523015 | -1.31279 |
| 33 | C | 1.23251  | 131.9887 | -21.7917 | 3.224945 | 0.479939 | -1.20306 |
| 34 | C | 1.467999 | 123.561  | 0.068681 | 3.915776 | -3.9E-05 | 1.25E-05 |
| 35 | C | 1.467995 | 123.8564 | -0.03155 | 3.224994 | -0.48012 | 1.203072 |
| 36 | O | 1.232511 | 123.561  | -0.03994 | 1.998137 | -0.52324 | 1.31283  |
| 37 | C | 1.497593 | 118.7775 | 179.8382 | 4.04396  | -0.94816 | 2.366262 |
| 38 | H | 1.086694 | 109.0164 | -179.739 | 3.377438 | -1.27014 | 3.161865 |
| 39 | H | 1.09178  | 110.5759 | 59.7714  | 4.686757 | -0.14459 | 2.731045 |
| 40 | H | 1.091684 | 110.6832 | -59.0263 | 4.692761 | -1.77568 | 2.072921 |
| 41 | C | 1.372144 | 118.0717 | 179.9695 | 5.28792  | 8.57E-05 | 3.14E-05 |
| 42 | C | 1.224094 | 179.9993 | 123.0361 | 6.512014 | 0.000205 | 6.02E-05 |
| 43 | C | 1.497592 | 117.6615 | -179.809 | 4.043866 | 0.947956 | -2.3663  |
| 44 | H | 1.091776 | 110.5782 | -120.368 | 4.687008 | 0.144544 | -2.73081 |
| 45 | H | 1.091687 | 110.681  | 120.8346 | 4.692321 | 1.775789 | -2.07308 |
| 46 | H | 1.086694 | 109.0164 | 0.124927 | 3.377312 | 1.269522 | -3.16204 |
| 47 | C | 1.42772  | 179.9282 | 10.57767 | -4.50393 | 5.412227 | -0.05429 |
| 48 | C | 1.3983   | 120.447  | -108.739 | -5.50773 | 5.45389  | -1.02686 |
| 49 | C | 1.398299 | 120.438  | 71.25827 | -4.50444 | 6.369032 | 0.965399 |
| 50 | C | 1.384519 | 120.278  | 179.9728 | -6.48767 | 6.430693 | -0.97725 |
| 51 | H | 1.083661 | 119.4814 | -0.07264 | -5.51238 | 4.715965 | -1.82044 |

|    |   |          |          |          |          |          |          |
|----|---|----------|----------|----------|----------|----------|----------|
| 52 | C | 1.384516 | 120.2804 | 179.9558 | -5.48681 | 7.343732 | 1.007653 |
| 53 | H | 1.083668 | 119.4749 | -0.12439 | -3.73043 | 6.340937 | 1.723336 |
| 54 | C | 1.388532 | 120.2384 | 0.074779 | -6.48035 | 7.377659 | 0.038252 |
| 55 | H | 1.083938 | 119.6874 | -179.983 | -7.26145 | 6.453883 | -1.73597 |
| 56 | H | 1.083951 | 119.6925 | -179.993 | -5.478   | 8.080847 | 1.802343 |
| 57 | H | 1.083849 | 120.0775 | 179.9577 | -7.24852 | 8.141435 | 0.074234 |
| 58 | C | 1.398811 | 179.9992 | 49.51662 | 7.910825 | 0.000337 | 0.000113 |
| 59 | C | 1.409393 | 120.2155 | 7.352438 | 8.620108 | -0.44908 | 1.132071 |
| 60 | C | 1.409392 | 120.2155 | -172.648 | 8.620107 | 0.449889 | -1.13179 |
| 61 | C | 1.378645 | 119.8874 | -180     | 9.998729 | 0.447098 | -1.12441 |
| 62 | C | 1.378645 | 119.8874 | -180     | 9.99873  | -0.44604 | 1.124786 |
| 63 | C | 1.39294  | 120.0227 | -0.00051 | 10.68876 | 0.000594 | 0.000214 |
| 64 | H | 1.083061 | 119.4961 | -0.00348 | 8.073861 | 0.794939 | -2.00103 |
| 65 | H | 1.083084 | 119.9407 | 179.9986 | 10.54466 | 0.79236  | -1.99379 |
| 66 | H | 1.083061 | 119.496  | -0.0039  | 8.073861 | -0.79423 | 2.001272 |
| 67 | H | 1.083084 | 119.9407 | 179.9987 | 10.54467 | -0.7912  | 1.994205 |
| 68 | H | 1.083637 | 119.6946 | -180     | 11.7724  | 0.000696 | 0.000254 |
| 69 | C | 1.427709 | 179.9286 | 9.939291 | -4.50416 | -5.41221 | 0.054092 |
| 70 | C | 1.398302 | 120.4468 | -107.2   | -5.51536 | -5.44602 | 1.01928  |
| 71 | C | 1.3983   | 120.4383 | 72.79714 | -4.49737 | -6.37677 | -0.95825 |
| 72 | C | 1.384517 | 120.278  | 179.9753 | -6.49534 | -6.42279 | 0.969685 |
| 73 | H | 1.083661 | 119.4817 | -0.0667  | -5.52575 | -4.70201 | 1.807097 |
| 74 | C | 1.384514 | 120.2804 | 179.9584 | -5.4799  | -7.3513  | -1.00058 |
| 75 | H | 1.083669 | 119.4754 | -0.11867 | -3.71756 | -6.35485 | -1.71041 |
| 76 | C | 1.388533 | 120.2387 | 0.069742 | -6.48078 | -7.37745 | -0.03851 |
| 77 | H | 1.083938 | 119.6872 | -179.984 | -7.27486 | -6.43987 | 1.72266  |
| 78 | H | 1.083951 | 119.6924 | -179.994 | -5.46541 | -8.09445 | -1.78955 |
| 79 | H | 1.083849 | 120.0776 | 179.9603 | -7.24903 | -8.14115 | -0.07452 |

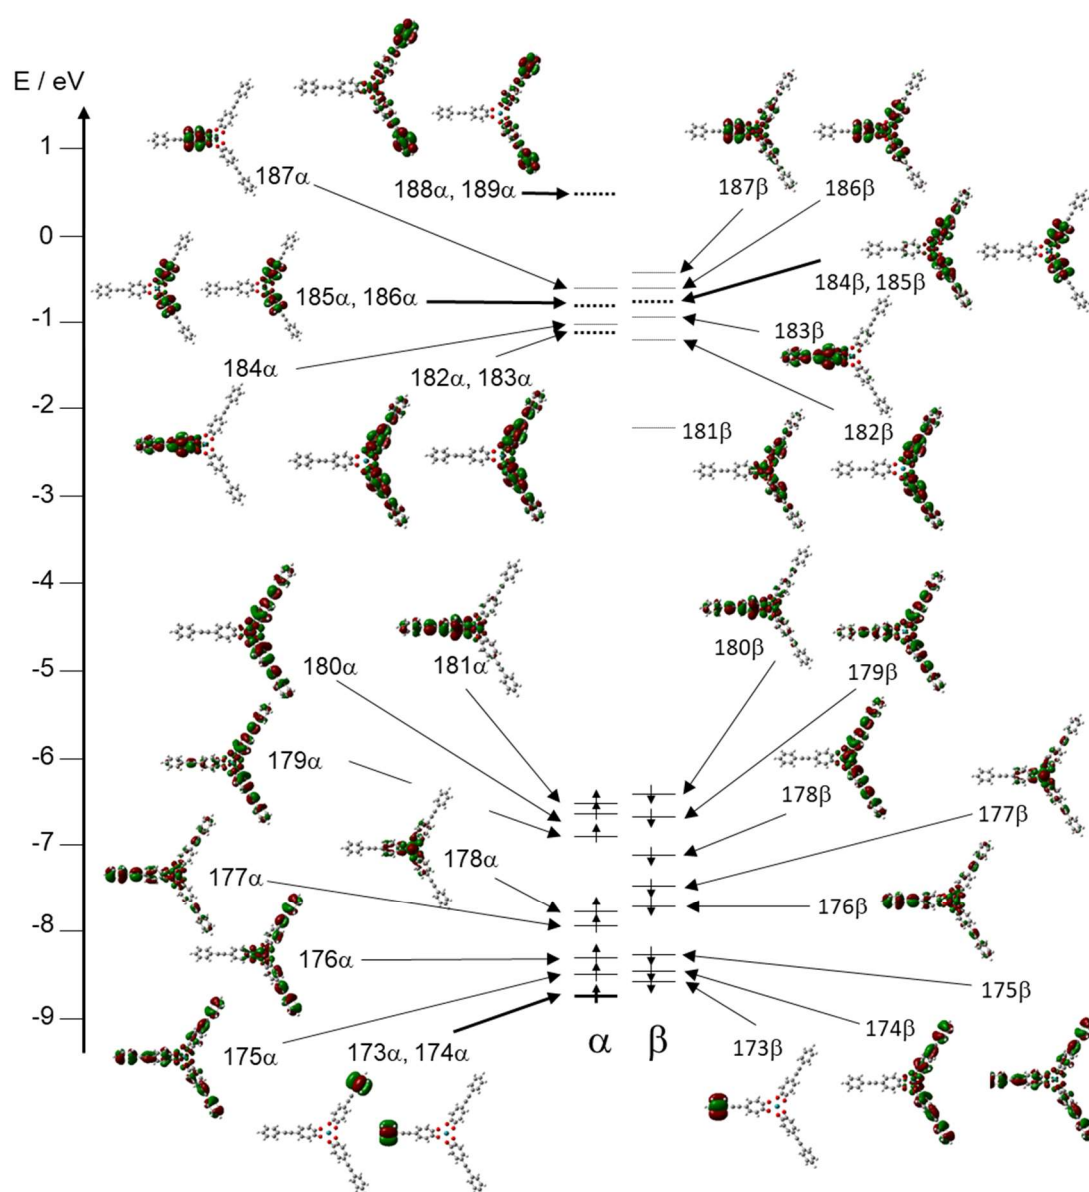

**Figure S52** Frontier MO diagrams of **4c** calculated by DFT/ucam-b3lyp.

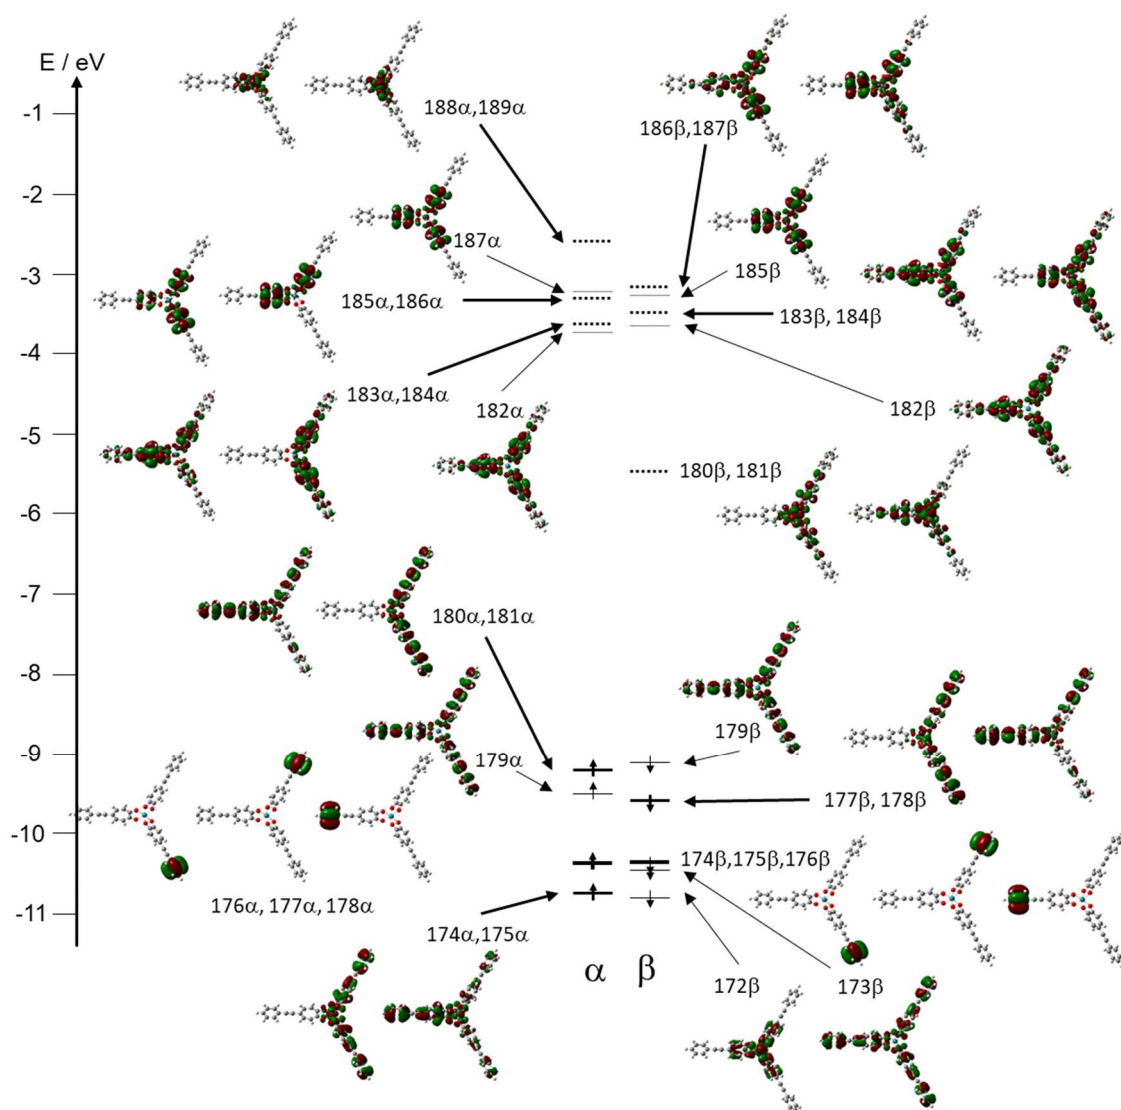

**Figure S53** Frontier MO diagrams of  $4c^+$  calculated by DFT/ucam-b3lyp.

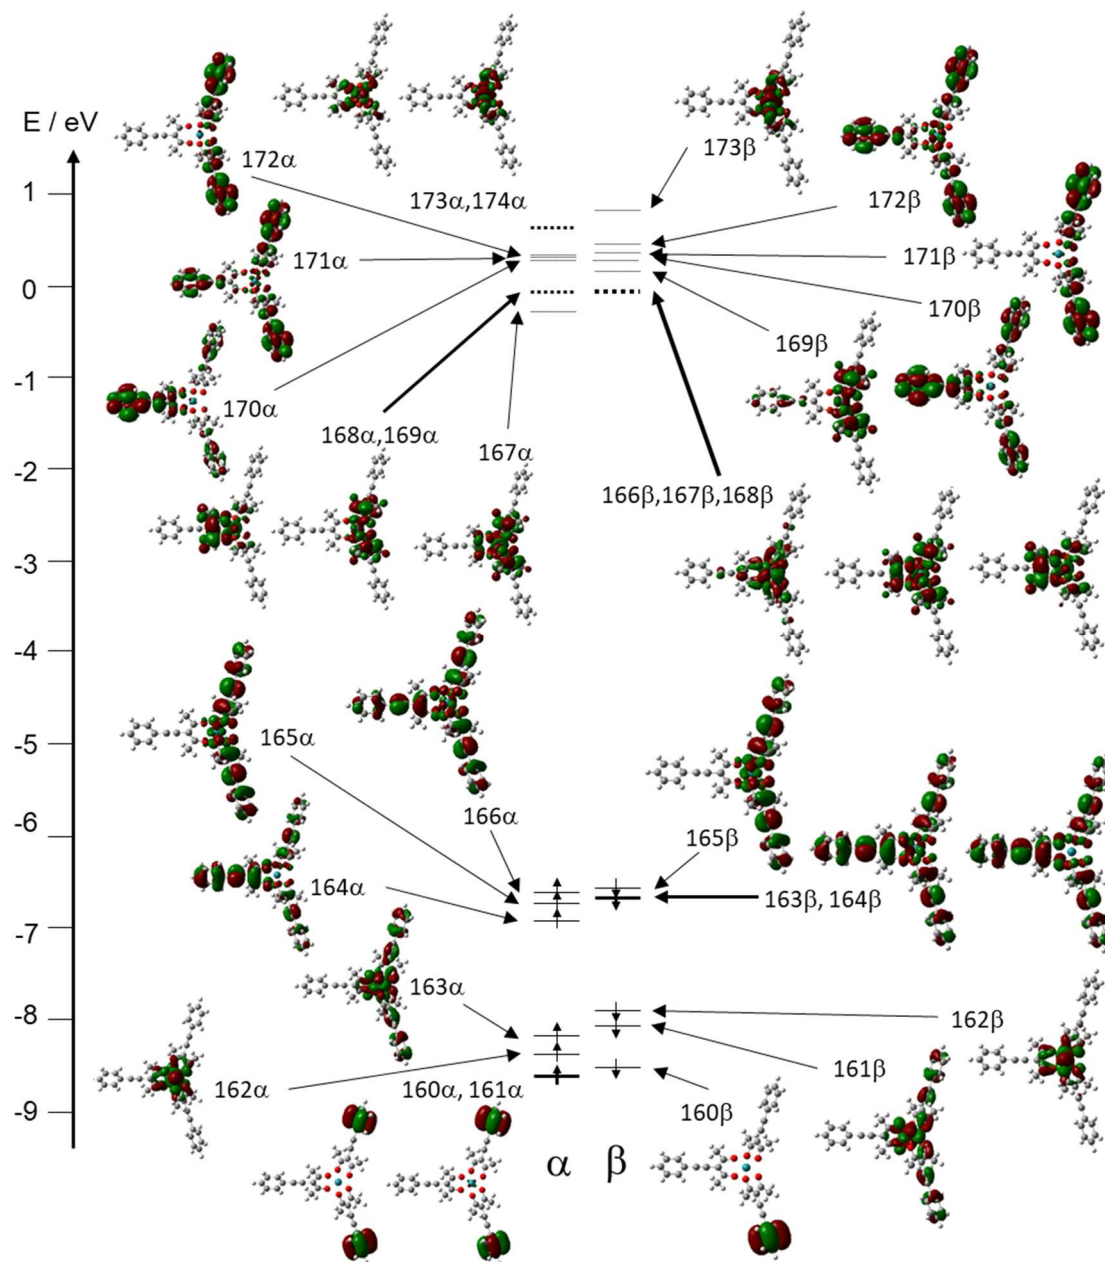

**Figure S54** Frontier MO diagrams of **6c** calculated by DFT/ucam-b3lyp.

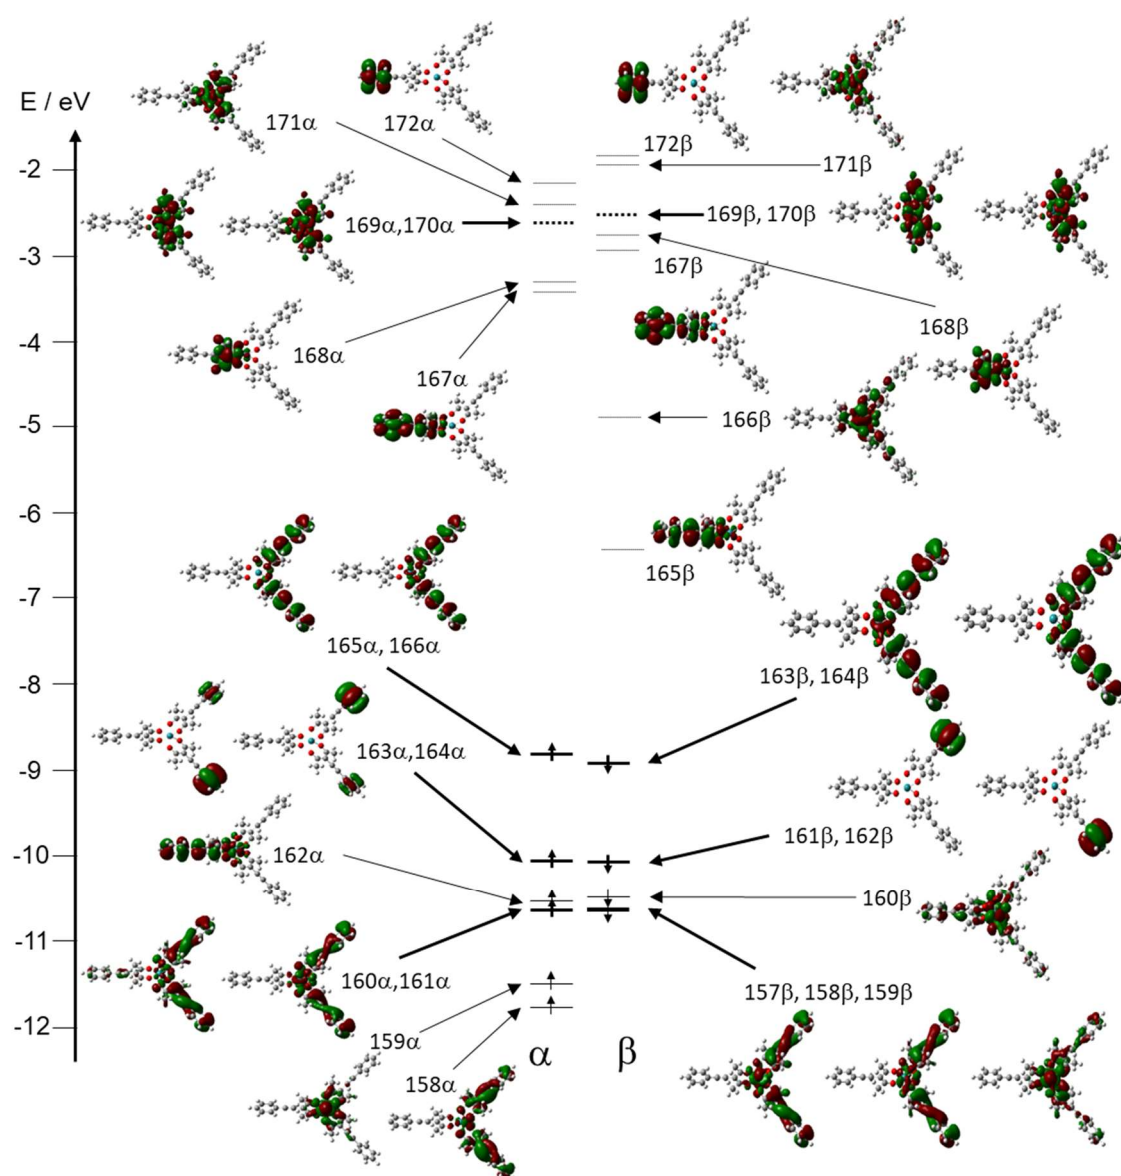

**Figure S55** Frontier MO diagrams of  $6c^+$  calculated by DFT/ucam-b3lyp.

## Time-course UV-vis spectra

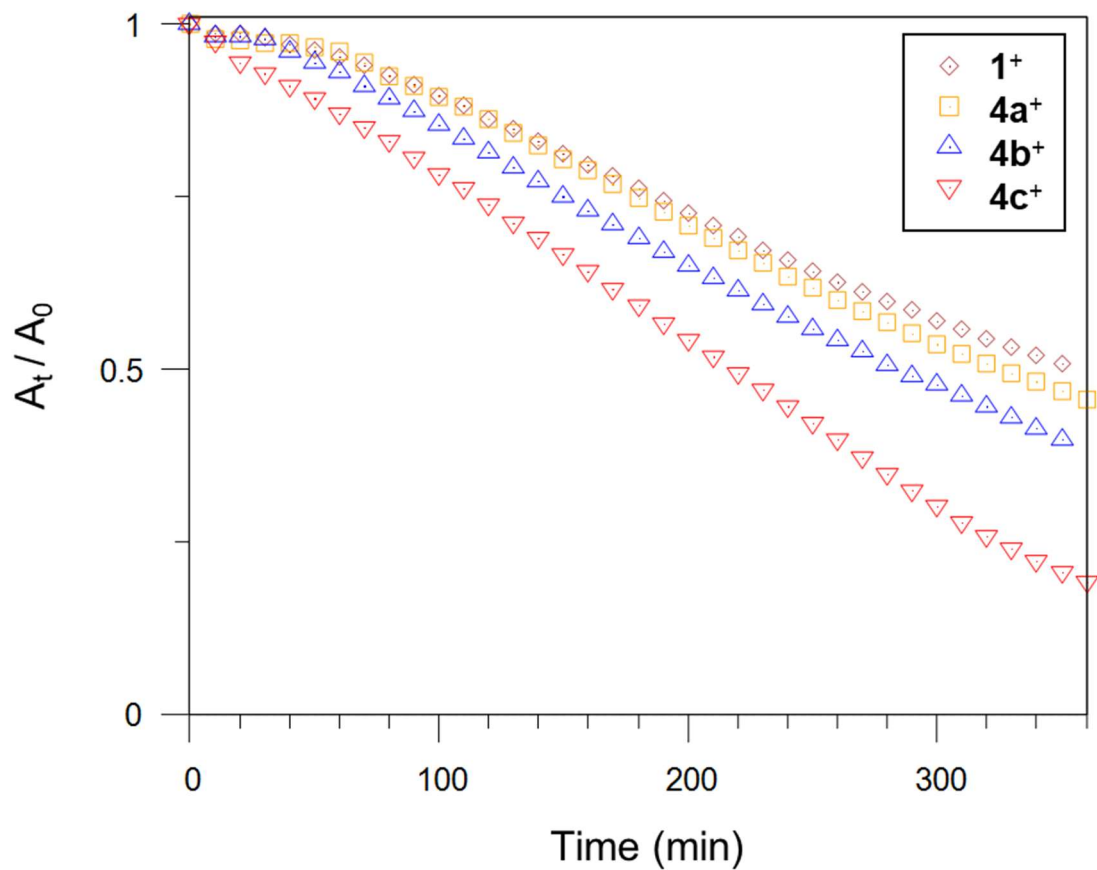

**Figure S56** Time-dependent absorption changes of oxidized complexes  $1^+$ ,  $4a^+$ ,  $4b^+$  and  $4c^+$ , in-situ prepared by the addition of CAN. The relative absorption at 800 nm ( $A_t / A_0$ ,  $A_t$ : absorption at an arbitrary time,  $A_0$ : absorption in the initial state) is plotted against the time after the addition of CAN.



## References

- 1 G. M. Sheldrick, *Acta Crystallogr. Sect. A*, 2015, **71**, 3–8.
- 2 G. M. Sheldrick, *Acta Crystallogr. Sect. C*, 2015, **71**, 3–8.
- 3 O. V. Dolomanov, L. J. Bourhis, R. J. Gildea, J. A. K. Howard and H. Puschmann, *J. Appl. Crystallogr.*, 2009, **42**, 339–341.
- 4 Y. Kasahara, Y. Hoshino, M. Kajitani and K. Shimizu, *Organometallics*, 1992, **11**, 1968–1971.
- 5 T. Hashimoto, S. Hara, Y. Shiraishi, K. Natarajan and K. Shimizu, *Chem. Lett.*, 2003, **32**, 874–875.
- 6 I. R. Baird, B. R. Cameron and R. T. Skerlj, *Inorg. Chim. Acta.*, 2003, **353**, 107–118.
- 7 T. Kundu, S. M. Mobin and G. K. Lahiri, *Dalton Trans.*, 2010, **39**, 4232–4242.
- 8 J. Yoshida, K. Kuwahara and H. Yuge, *J. Organomet. Chem.*, 2014, **756**, 19–26.
